# Supplementary material for: Characterization of filter photometer artefacts in soot and dust measurements – laboratory and ambient experiments using a traceably-calibrated aerosol absorption reference
Source: Copernicus journal article supplement (doi:10.5194/egusphere-2024-3995), 2025-02-24
Supplement: Supplementary file [file egusphere-2024-3995-AC1-supplement.pdf]

**Answer to Referee #2 on:** *“Characterization of filter photometer artefacts in soot and dust measurements – laboratory and ambient experiments using a traceably-calibrated aerosol absorption reference”*

We would like to thank the referee for the time invested in the review process of the manuscript and for the useful comments and remarks that will help improve our study. A detailed reply to the referee comments is provided below. The text, added to the manuscript or significantly modified, is shown in blue, with the bold text marked in places to show the additions.

**General comments**

- **The manuscript, in particular the introduction, is not providing all the necessary elements so that a non-fully expert reader can understand the problem and the chosen approach, as well the discussion of the results. I would encourage the authors to develop more in detail the different artefacts associated to filter-based measurements and the choice of the reference techniques.**

Following the referee comment, we have significantly expanded and modified the Introduction and different parts of the text to make it more understandable and readable. Changes can be found in the tracked changes version of the document attached.

- **Tables of results and plots in the main manuscript are generally missing consideration of uncertainties or statistical variability and this would be required for supporting data presentation, discussion and results**

We appreciate the comment provided by the referee on the topic of measurement uncertainties and statistical variability. It should be noted that for the main results of the text, a range of the uncertainty and goodness of the results is given in the Figures in the supplementary where the fit where the value is obtained from is shown, as it is the upper and lower 95% confidence interval of the results in Tables S2 and S3. We have changed the tables and figures in the manuscript to include the uncertainties and better support the results.

We have also modified the text of Section 3, where a bigger emphasis on the uncertainty of the C is introduced:

“Table 3 shows the multiple-scattering parameter, C, after correcting the attenuation coefficients for the cross-sensitivity to scattering for each of the sample types. The values have been obtained for each of the sample groups as the slope of the orthogonal fit of the attenuation coefficients corrected for the cross-sensitivity to scattering  $b_{\text{atn}} - \text{cor}$  (cf. eq. 1) vs. the reference absorption coefficients from the PTAAM-2I (cf. Figs. S8-S24). It should be noted that due to the effect of interpolation/extrapolation from/to the filter photometer or PTAAM-2I wavelengths the C values reported at the filter photometer wavelengths vs. the PTAAM-2I could vary. This effect is expected to be the highest for dust, since the AAE between 370 and 660 nm for dust is higher than between 660 and 950 nm. During the UGR ambient measurements, the uncertainty of the regression due to interpolation of the absorption coefficient to 637 nm using AAE derived from the measurements at the two PTAAM wavelength (450 and 808 nm) instead of the seven AE33 ones (307 - 950 nm) was 4%. The uncertainty of the fit is shown by the  $R^2$  and 95% confidence interval range for each sample in Tables S2 and S3. This confidence interval is obtained by introducing the measurement error into the Deming regression fit by error propagation of the standard deviation and the instrument uncertainty.”

And:

“Two types of soot were analyzed: propane (mean volume particle diameter,  $D_p$ , of 341 nm) and diesel soot ( $D_p$  of 177 nm), for which the C for the AE33 at 450/808 nm was 4.08/3.95 and

6.25/5.27, respectively (cf. Table 3). The CLAP featured C values at 450/808 nm of 5.10/4.26 for propane soot and 6.79/5.80 for diesel soot. These C values are consistent with the values found in Drinovec et al. (2022) for similar diesel and propane soot samples, between 5.3 and 3.2 at 532 nm, and between 4.2 and 2.6 at 1064 nm, for 100 and 500 nm volume size mode, respectively. There are some differences due to the difference in the measuring wavelength and the different flow used in the compared studies for the AE33. Weingartner et al. (2003) studied the C values for an aethalometer AE30 (a prototype of the AE31), and comparison is limited to some extent, they found for soot C values around 2.14 for diesel soot at 450 and 660 nm. These values need to be interpreted with caution. The aethalometer model AE31 uses quartz filter tape, which features significantly higher (relative) C values when compared to different AE33 filter tapes, as shown in the original AE33 publication (Drinovec et al., 2015). Furthermore, Yus-Díez et al. (2021) showed important influence of the filter type in AE33 on the C parameter. The C value of 1.44 recalculated for the CLAP from parameters in Ogren et al. (2017), based on the experiments from Bond et al. (1999) on aerosol mixtures of pure nigrosin with pure ammonium sulfate using also a reference extinction minus scattering measurement, is clearly lower than the nigrosin and/or any soot mixture measured in this study and in Drinovec et al. (2022). Unlike for mineral dust samples, the goodness of the fit (Tables S2 and S3) was very good for both for both soot samples for the AE33 and the CLAP through-out the different wavelengths ( $R^2 > 0.95$ ). Furthermore, Table S4 summarizes the C and  $m_s$  parameters following Ogren et al. (2017) and Bond et al. (1999) nomenclature, i.e. K1 and K2 parameters.

- **The discussion on the discrepancies between the PTAAM and the MAAP is interesting and of potential relevance for the community. The authors identify as the limitation of the MAAP the reduced angular measurements, and the authors mention other more angular resolved instruments – such as for instance the PPUniMI – developed to overcome these issues. Does any other studies have provided comparison against those other instruments and how these investigations, if they exist, provide support to your analysis?**

We identify the reduced angular measurements as a limitation of the instrument, as it has been shown when by Valentini et al. (2020) when they compared the results from the PP\_UniMI with all the angles and using a MAAP-like set-up, or by Bernardoni et al. (2021) where they used both the PP\_UniMI and the MAAP to obtain the C parameters for an ambient campaign in Milano. Similarly, Massabò et al. (2013) compared the lab built Multi-Wavelength Absorbance Analyzer (MWAA) with the MAAP and the University of Milano PP\_UniMi. However, our manuscript is the first to report the comparison between a traceably calibrated direct reference absorption measurement (such as using the PTAAM-2I) and the MAAP, so we cannot reference previous studies. There is a comparison between indirect extinction-minus-scattering (EMS) measurement and MAAP (Romshoo et al., 2022) which shows a size dependent ratio between MAAP and EMS decreasing with volume mean diameter of the soot particles – for fresh soot the ratio is between 1.2 and 1.4 and around 1 for larger soot particles (all soot samples  $SSA < 0.11$ ). We have added this information and the reference to the manuscript text.

- **The text uses a lot of acronyms and the reading can result quite hard in some points also because many numbers (C for several instruments, aerosol types, wavelengths) are provided in the text. Please consider to introduce an acronym table and to simplify the text when possible to facilitate reading.**

We acknowledge we introduce many acronyms through-out the manuscript, such as instrument names, abbreviation for measurements and variables, etc. Hence, we have checked the manuscript and eliminated the use of certain acronyms such as FP for filter photometers, or PM for particulate matter. Furthermore, we have introduced an acronym table as an appendix at the end of the manuscript (Appendix A).

Also, as the referee points out, the broad range of measurements for the C depending on the aerosol source, wavelength and instrument results into a text with many numbers. We have made the effort, when possible, to modify the text to facilitate the reading of the manuscript.

### Specific comments

- **Lines 8-14: are the differences identified for C relevant within uncertainties**

In accordance with the answer to the general comment #2, we have modified some sections of the manuscript to better capture the uncertainties of the results. The C differences identified in the abstract are relevant and are larger than the uncertainties.

- **Line 51: the C factor is mentioned but not introduced / explained**  
**Line 52: this is relevant for all absorbing species, not only dust**

Both this and previous paragraphs were expanded to include these comments and are now modified:

“The most widely used instrumentation to determine aerosol absorption coefficients, especially in ambient measurements, are filter absorption photometers (Moosmuller et al., 2009): aethalometers (Hansen et al., 1984; Drinovec et al., 2015), particle soot absorption photometers (PSAP; Bond et al., 1999), continuous light absorbing photometers (CLAP; Ogren et al., 2017) and the multi angle absorption photometers (MAAP; Petzold and Schonlinner, 2004). Their working principle (with some design variations) is based on the continuous accumulation of the aerosol sample on the filter, through which the attenuation of light in comparison with a blank filter is measured to derive absorption coefficients and the equivalent black carbon concentrations (eBC; Petzold et al., 2013). [Filter photometers feature three main artefacts that influence and hinder the correct determination of the absorption coefficients. The first is the filter loading effect which can be corrected using assumptions \(Bond et al., 1999; Weingartner et al., 2003; Collaud Coen et al., 2010\), or measurements \(Drinovec et al., 2015, 2017\). The second is the amplification of absorption of light in the particles resulting from the scattering of light by the filter tape fibers, which is corrected by introducing a multiplicative multiple-scattering parameter C, describing the enhancement of absorption by the scattering of light in the filter matrix \(Arnott et al., 2005; Ogren et al., 2017; Drinovec et al., 2015\). The third effect is the scattering of light by the particles embedded in the filter, reducing the transmission of light through the sample-laden filter due to scattering which is misinterpreted as absorption \(Yus-Díez et al., 2021; Drinovec et al., 2022\). The three artefacts are treated as separate, even though they are somewhat co-dependent, as shown in the light-transport models \(Müller et al., 2014\).](#)

[The filter loading effect results in the loss of sensitivity of the instrument due to the increase in the sample load in the filter \(Bond et al., 1999; Weingartner et al., 2003\). Multiple algorithms for the compensation of the filter loading effect have been developed for different filter photometer models \(Bond et al., 1999; Virkkula et al., 2007; Weingartner et al., 2003; Drinovec et al., 2015; Ogren et al., 2017\). The newest aethalometer models \(AE33 and latest versions\) feature a correction with an integrated compensation algorithm using online measurements of the filter loading effect \(Drinovec et al., 2015\). In addition, the physical properties of the sampled particles influence the multiple scattering of the collected particles within the filter \(Weingartner et al., 2003; Lack et al., 2008; Virkkula et al., 2015; Drinovec et al., 2015; Yus-Díez et al., 2021\), since particles with a higher single-scattering albedo produce an enhancement of the multiple scattering of light, increasing the apparent attenuation \(Yus-Díez et al., 2021\), and smaller particles have the ability of being deposited deeper inside the filter matrix, also enhancing the apparent attenuation measured by the filter photometers \(Drinovec et al., 2022\).](#)

[Filter photometers were designed for black carbon measurements \(Gundel et al., 1984\), however, the measurement was interpreted concurrently as a value of the absorption coefficient \(Hansen](#)

et al., 1982, 1984). Eventually, filter photometers were also used to obtain the absorption coefficients for dust measurements (Fialho et al., 2005; Fialho et al., 2006; Di Biagio et al., 2017). The sensitivity of filter photometers depends on the depth at which particles are trapped in the filter matrix, which differs across filter photometer models and the aerosol particle size. This is taken into account by the MAAP using a simple radiative transfer model that takes into account the backscattering of light at two angles (Petzold and Schönlinner, 2004), or observed in other filter photometers as the dependence of the multiple-scattering parameter C on the single scattering albedo and the size of the particles (Yus-Díez et al., 2021; Drinovec et al., 2022). Therefore, in order to use the filter photometers, the measurement needs to be characterized with a representative sample and its artefacts quantified, which requires a better characterization for soot-like particles, mineral dust samples and ambient measurements where these two types of aerosol species appear simultaneously.”

- **Lines 67-68: it is not clear why the EMS method is more relevant for laboratory than field measurements, please explain**

Extinction-minus-scattering (EMS) works well for low SSA samples. Ambient samples, especially at different background sites, frequently feature high SSA, and, when combined with imperfect nephelometer truncation error correction, increase the uncertainty of EMS above 100% (Modini et al., 2021). We have modified the aforementioned sentence to:

“A well-established method to obtain the absorption coefficient, especially for laboratory experiments, is the extinction-minus-scattering method, which is usually performed by Cavity Phase Shift Extinction analyzers (CAPS; Massoli et al., 2010; Modini et al., 2021). Extinction-minus-scattering-obtained absorption coefficients are fairly robust and mainly feature low uncertainties, however for high single scattering albedo values, which are frequent in ambient measurements (Laj et al., 2020), where the extinction is dominated by scattering, this methodology introduces very high uncertainties (Moosmüller et al., 2009; Singh et al., 2014), especially when combined with imperfect nephelometer truncation error correction of the total scattering coefficient (Modini et al., 2021).”

- **Line 75: the MAAP was already introduced in line 39**

We mention the MAAP again in line 75 to demonstrate its application as an ACTRIS pseudo-reference in addition to the line 39, where it was introduced.

- **Line 82: the nephelometer is mentioned without any indication of which quantity is measured with this instrument**

We have modified the paragraph as follows:

“We use absorption coefficients, measured by the novel PTAAM-2 $\lambda$ , and the scattering coefficients, measured by the integrating nephelometer Aurora 4000, to fully quantify the artefacts of widely deployed filter photometers: the AE33, the CLAP and the pseudo-reference MAAP. For this purpose, we have performed chamber experiments with a wide variety of aerosol types during a laboratory campaign, as well as ambient measurements in a polluted urban background atmosphere in Granada (Spain).”

- **Line 95: please recall how the soot are produced (combustion conditions) and their main properties (chemical, physical)**

We have modified the first paragraph in the section to:

“Different samples of dust and soot-like aerosolized particles were measured in this study (cf. Table 1). Mineral dust, which is the most abundant aerosol compound in the atmosphere by mass,

with poorly constrained influence on the climate, features a small net cooling effect (Kok et al., 2023). BC particles, which are aggregate structures of graphene layers originated from the incomplete combustion of fossil fuel (Bond and Bergstrom, 2006), feature very high mass absorption cross-section values, and as such are the most important aerosol climate forcer (Bond et al., 2013; Szopa et al., 2021). Samples with high BC content: Euro-3 engine diesel soot and propane soot (Drinovec et al., 2022) were sampled. In addition, pure quartz dust (Sigma-Aldrich 342890-100G) was used as a purely scattering dust reference sample. Fig. S1 shows the CLAP filter spots as a visual reference for the different samples.”

- **Line 104: if a reference exists for the dust generation device, please cite it (manufacturer)**

It is an in-house device. It follows the same procedure as the one described in Moosmüller et al. (2012).

- **Lines 110-123: as volumetric quantities, if the absorption coefficient measurements are all reported to the same temperature and pressure (i.e. Standard Temperature and Pressure) or not should be mentioned. If not, is the difference in T and p reference affecting the comparison and to what extent?**

We have included the following text at the first paragraph of section 2 for clarification purposes:

“To allow comparison between the instruments, all measurements are reported in the same conditions of standard temperature and pressure ( $T=273.15$  K and  $P=1013.25$ ).”

- **Line 133: size instrumentation is introduced but some more details on the type of measured diameter and potential corrections applied to the data should be mentioned**

We have modified the commented text to provide a more detailed description of the size instrumentation used:

“Aerosol particle size distribution measurements were performed using an optical particle spectrometer (GRIMM 11-D) for mineral dust samples, which measures the number of particles in 31 bins for bins with an optical diameter size ranging from 0.253 to 35.15  $\mu\text{m}$ . The particle size distribution for soot-like particles (diesel and propane) was measured with a scanning mobility parameter sizer (TSI model 393L75), which measures the number of particles in 64 bins for particle mobility diameters ranging from 15.12 to 982.17 nm. Given the differences in the size range and type of diameter reported by each instrument, comparison for particle size dependence is performed in a qualitative manner.”

- **Line 137: if the Teri (2022) correction scheme requires information on the complex refractive index of the aerosols to be applied, the hypothesis used should be explained**

We have introduced the following text for clarification:

“The instrument was set to measure total and back-scattering coefficients and angular truncation errors were corrected applying Teri et al. (2022) correction schemes using the scattering Ångström exponent for the size distribution and refractive indexes used by Anderson and Ogren (1998) and Müller et al. (2011b).”

- **Lines 167-169: not clear what is the “compensation scheme” used – please give more details**

We have modified the commented paragraph for clarification:

“Using a constant multiple scattering parameter to compensate the artefacts of the filter photometer measurements under scenarios with high single scattering albedo, samples have been shown to introduce a large overestimation of the absorption coefficients measured with

aethalometers (Yus-Díez et al., 2021). To compensate for this cross-sensitivity to scattering of the filter photometers, we have applied the approach proposed by Yus-Díez et al. (2021) for the AE33, CLAP and MAAP, with a more detailed description provided below.”

- **Lines 178-180: please provide more explanation as I am not sure this could be clear for non-fully expert readers**

We have modified the paragraph to:

“The pseudo-reference measurements used by Bernardoni et al. (2021) and Yus-Díez et al. (2021) were collected with different filter photometers including polarimetric measurements with PP\_UniMI. While PP\_UniMI and MAAP feature inversion algorithms that take into account the backscattering of light from the sample-laden filter to retrieve the absorption measurements, they are still subject to the main filter photometers artefacts. Here we use as reference an instrument that does not suffer from the size and scattering artefacts – the PTAAM-2 $\lambda$  (Drinovec et al., 2022). As a consequence, we were able to determine the filter photometer correction parameters without introducing additional artefacts from the (pseudo) reference measurements.”

- **Section 3.1 misses discussion about laboratory soot experiment**

The soot-like particles feature single scattering albedo values below the threshold above which the scattering parameter becomes important, therefore no correction for the cross-sensitivity to scattering is necessary and therefore performed.

We have modified the beginning of this section to comment on this in the main text:

“During the laboratory experiments we analyzed soot-like and dust samples. The soot-like particles feature single scattering albedo values below the threshold above which the scattering parameter becomes important, therefore no correction for the cross-sensitivity to scattering is necessary and therefore performed (Yus-Díez et al., 2021). We analyzed the filter photometer scattering cross-sensitivity artefact by measuring quartz as a reference sample for purely scattering mineral dust.”

- **Fig 2 caption: “random sample” to replace with more specific sample identification**

“Morocco Surface Random sample” is the published name of the sample given in González-Romero et al. (2023), and we have chosen to keep the same name. We have introduced further clarification to avoid possible confusion with its label.

“a) Example of the typical time evolution for a resuspended mineral dust sample, during the measurement of the Saharan desert sample, “Morocco Surface random”, Table 1, and described in further detail in González-Romero et al. (2023) - the attenuation coefficient (batn) of the AE33 and CLAP, and the PTAAM-2 $\lambda$  absorption coefficient, and b) the temporal evolution of the absorption from the PTI, the absorption Ångström Exponent, and the multiple-scattering parameter for 2 Saharan dust event days during the campaign in Granada (time in UTC). Note the logarithmic scale on the y-axis.”.

- **Line 254: as it is absorption, then scattering is also used for EMS calculation with CAPS, to be mentioned**

We have modified the sentence to include the comment:

“Di Biagio et al., (2017) performed a similar study, albeit for an aethalometer AE31 (Magee Scientific, USA) which has been shown to have C values higher than those of the AE33 (Drinovec et al., 2015; Savadkoobi et al., 2023), where they (Di Biagio et al., 2017) measured reference dust

absorption using [the extinction-minus-scattering method using a CAPS PMex and a nephelometer \(model 3563, TSI Inc.\)](#) at 450 nm and the extrapolated MAAP absorption coefficients at 660 nm.”

- **Lines 256-257: the fact that the C found in the present analysis using PTAAM data is lower than previous studies using MAAP observations as reference absorption is not in contradiction with the discussion in sect. 3.3?**

Indeed, the C from Di Biagio et al. (2017) for dust at 660 nm, which they find using MAAP as reference, is higher than the one found in our study (Sect. 3.3). We attribute the higher values compared with Di Biagio et al. (2017) on the different aethalometer model AE31 with the quartz filter tape. The AE31 quartz tape features significantly higher C values when compared to different AE33 filter tapes, as shown in the original AE33 publication (Drinovec et al., 2015). Furthermore, Yus-Díez et al. (2021) show important influence of the filter type in AE33 on the C parameter. We have incorporated this in the text – see answer below.

- **Lines 265-269: would add comparison with soot data from Weingartner et 2003**

We have introduced the following statement:

“Weingartner et al. (2003) studied the C values for an aethalometer AE30 (a prototype of the AE31), and comparison is limited to some extent, they found for soot C values around 2.14 for diesel soot at 450 and 660 nm. These values need to be interpreted with caution. The aethalometer model AE31 uses quartz filter tape, which features significantly higher C values when compared to different AE33 filter tapes, as shown in the original AE33 publication (Drinovec et al., 2015). Furthermore, Yus-Díez et al. (2021) show important influence of the filter type in AE33 on the C parameter.”

- **Lines 279-281: is this because urban air masses are dominant?**

Indeed, this is our interpretation, supported by the PSD separation between the two types of events, as can be seen in Fig. S2b. We have modified the last sentence in the paragraph to make the message clearer:

“It is the combination of the absorbing soot-like particles (**in the fine mode**) and the **coarser** dust particles present during the campaign that influenced the C, but the **small** changes of their relative contribution (**cf. Fig S2b**) did not have an effect on the resulting C values.”

- **Sect 3.2: the comparison with the literature indicate both higher and lower values when referring to different aerosol types and photometer models. The conclusion of the comparison is not clear then, and would suggest to develop this point so that a clear message is delivered.**

We appreciate the comment. Hence, at the end of the section we have introduced a paragraph to provide a summary of the results and a clear message. Furthermore, we have introduced a new section where we provide a summary and comparison on the multiple scattering values and harmonization factors: Section 4.

“In brief, this section showcases the variation of the multiple scattering parameter for different aerosol types: mineral dust, soot-like particles and ambient urban aerosol. We have found that the key parameter is the source-dependent particle size, with smaller particles showcasing much higher values of the multiple scattering parameter C. Therefore, the comparison of our results with the literature showcases the impact of the variability introduced by different sources (and therefore size). When comparing these values with the previously published ones, it is important to take into account the use of different filter material in different (or same) filter photometer models. In this regard, this study provides a focused and in-detailed analysis of the behavior of

the C parameter for different aerosol types with different particle size ranges in two most-used filter photometers –the Aethalometer AE33 and the CLAP.”

- **Line 299: how much the differences in diameter definition can influence the results and their interpretation?**

We have modified the first paragraph of this subsection, where this comment applies to provide an approximate indication of the expected shift.

“The conversion of the optical diameter to the mobility diameter would require assumptions on the complex refractive index, density, and most importantly, shape of mineral dust, as shown in Huang et al. (2020), which falls beyond the scope of this manuscript. Huang et al. (2020) showed that, for different assumptions of the complex refractive index and particle shape, optical diameters are on average 56% lower than geometric, which in turn are a 45% lower than aerodynamic diameters. Following the same assumptions on particle density and sphericity used to convert the UGR APS aerodynamic to mobility diameters, will result in an overall shift by  $\sim 1.7$  of the diameters, thus resulting in a higher effective diameter, i.e., a positive shift of the corresponding data points in Fig. 5 in the x-axis.”

- **Lines 364-369: would be good to have a reference for the results in relation to the stanBC campaign**

We can't provide a reference since the stanBC campaign manuscripts is still under preparation and results showcasing this comparison have not been featured in any conference/workshop presentation. If the stanBC campaign paper is submitted during our review phase, we intend to quote the manuscript in the public repository.

## References

- Bernardoni, V., Ferrero, L., Bolzacchini, E., Forello, A. C., Gregorič, A., Massabò, D., ... & Vecchi, R. (2021). Determination of Aethalometer multiple-scattering enhancement parameters and impact on source apportionment during the winter 2017/18 EMEP/ACTRIS/COLOSSAL campaign in Milan. *Atmospheric measurement techniques*, 14(4), 2919-2940.
- Di Biagio, C., Formenti, P., Cazaunau, M., Panguì, E., Marchand, N., and Doussin, J.: Corrigendum to “Aethalometer multiple scattering correction C ref for mineral dust aerosols” published in Atmos. Meas. Tech., 10, 2923 – 2939, 2017, *Atmospheric Measurement Techniques*, 10, 2923–2939, 2017.
- Drinovec, L., Močnik, G., Zotter, P., Prévôt, A. S. H., Ruckstuhl, C., Coz, E., Rupakheti, M., Sciare, J., Müller, T., Wiedensohler, A., and Hansen, A. D. A.: The "dual-spot" Aethalometer: an improved measurement of aerosol black carbon with real-time loading compensation, *Atmos. Meas. Tech.*, 8, 1965–1979, <https://doi.org/10.5194/amt-8-1965-2015>, 2015.
- Massabò, D., Bernardoni, V., Bove, M. C., Brunengo, A., Cuccia, E., Piazzalunga, A., ... & Vecchi, R. (2013). A multi-wavelength optical set-up for the characterization of carbonaceous particulate matter. *Journal of Aerosol Science*, 60, 34-46.
- Modini, R. L., Corbin, J. C., Brem, B. T., Irwin, M., Bertò, M., Pileci, R. E., Fetfatzis, P., Eleftheriadis, K., Henzing, B., Moerman, M. M., Liu, F., Müller, T., and Gysel-Beer, M.: Detailed characterization of the CAPS single-scattering albedo monitor (CAPS PMss) as a field-deployable instrument for measuring

aerosol light absorption with the extinction-minus-scattering method, *Atmos. Meas. Tech.*, 14, 819–851, <https://doi.org/10.5194/amt-14-819-2021>, 2021.

Moosmüller, H., Engelbrecht, J. P., Skiba, M., Frey, G., Chakrabarty, R. K., and Arnott, W. P.: Single scattering albedo of fine mineral dust aerosols controlled by iron concentration, *Journal of Geophysical Research: Atmospheres*, 117, 2012.

Romshoo, B., Pöhlker, M., Wiedensohler, A., Pfeifer, S., Saturno, J., Nowak, A., Ciupek, K., Quincey, P., Vasilatou, K., Ess, M. N., Gini, M., Eleftheriadis, K., Robins, C., Gaie-Levrel, F., and Müller, T.: Importance of size representation and morphology in modelling optical properties of black carbon: comparison between laboratory measurements and model simulations, *Atmos. Meas. Tech.*, 15, 6965–6989, <https://doi.org/10.5194/amt-15-6965-2022>, 2022.

Weingartner, E., Saathof, H., Schnaiter, M., Streit, N., Bitnar, B., and Baltensperger, U.: Absorption of light by soot particles: Determination of the absorption coefficient by means of Aethalometers, *J. Aerosol Sci.*, 34, 1445–1463, 2003.

# Characterization of filter photometer artefacts in soot and dust measurements – laboratory and ambient experiments using a traceably-calibrated aerosol absorption reference

Jesús Yus-Díez<sup>1</sup>, Luka Drinovec<sup>1,2</sup>, Lucas Alados-Arboledas<sup>3</sup>, Gloria Titos<sup>3</sup>, Elena Bazo<sup>3</sup>, Andrea Casans<sup>3</sup>, Diego Patrón<sup>3</sup>, Xavier Querol<sup>4</sup>, Adolfo Gonzalez-Romero<sup>5</sup>, Carlos Perez García-Pando<sup>5,6</sup>, and Griša Močnik<sup>1,2</sup>

<sup>1</sup>Centre for Atmospheric Research, University of Nova Gorica, Ajdovščina, 5270, Slovenia

<sup>2</sup>Haze Instruments d.o.o., Ljubljana, 1000, Slovenia

<sup>3</sup>Andalusian Institute for Earth System Research (IISTA-CEAMA), University of Granada, Granada, Spain

<sup>4</sup>Institute of Environmental Assessment and Water Research (IDAEA-CSIC), Barcelona, 08034, Spain

<sup>5</sup>Barcelona Supercomputing Center (BSC), Barcelona, 08034, Spain

<sup>6</sup>ICREA, Catalan Institution for Research and Advanced Studies, Barcelona, 08010, Spain

**Correspondence:** Jesús Yus-Díez (jesus.yus@ung.si)

**Abstract.** A novel reference absorption instrument, based on photothermal interferometry - the [dual-wavelength photothermal aerosol absorption monitor](#) PTAAM-2 $\lambda$ , and scattering measurements are used to characterize filter photometer artefacts in measurements of absorption coefficients of soot and dust-dominated aerosol samples within laboratory and ambient campaigns. [We provide, for different aerosol types, reference values of the multiple scattering parameter, quantifying the artefact introduced by the interaction between the light, the particles and the filter.](#)

The Aethalometer AE33 and the Continuous Light Absorption Photometer (CLAP) were characterized during a laboratory campaign where different ~~soot-like soot~~ and mineral dust samples were measured. Furthermore, ambient measurements during a campaign in Granada, Spain, were used to characterize the AE33 and MAAP (Multi Angle Absorption Photometer), a pseudo-reference absorption instrument.

The laboratory campaign showed significant wavelength dependence of the [calibration parameter – the](#) multiple-scattering parameter C. The C of AE33 at 450/808 was 4.08/3.95 and 6.25/5.27 for propane soot and diesel soot, respectively. For the CLAP the C was 5.10/4.26 and 6.79/5.80 ~~for propane for propane~~ and diesel soot, respectively. [For the different mineral dust samples analyzed in the laboratory, the](#) C at 450 nm ranged between 2.74 and 3.03 for the AE33 and between 2.50 and 2.80 for the CLAP. The ambient measurements [at Granada](#) showed an overall C of 4.72 at 450 nm and of 3.90 at 808 nm for the AE33.

The results for both the AE33 and the CLAP show a dependence with the particle size, with fine particles having the highest C values, and ~~as the aerosols become larger C levels off~~ [the C reducing and leveling off for larger particles](#). Both the laboratory and the ambient measurements of the AE33 showed overlapping results.

The cross-sensitivity to scattering was smaller for the CLAP than for the AE33. The values of the cross-sensitivity parameter  $m_s$  at 450/808 nm were 3.0%/1.5% for the AE33 and 2.4/0.9% for the CLAP ~~at 450/808 nm~~.

20 The intercomparison of the MAAP with the PTAAM-2 $\lambda$  during the ambient campaign in Granada showed that the ~~MAAP-derived absorption coefficients feature a~~ MAAP overestimates the absorption coefficients for 47% ~~overestimation at~~ 637 nm and features a cross-sensitivity to scattering of 2.4%.

## 1 Introduction

Light-absorbing aerosols (LAA) are a major cause of atmospheric warming due to their direct effect on Earth's radiative budget and their semi-direct radiative effects in the Earth's atmosphere (Szopa et al., 2021). However, the short lifetime of aerosols and the aging processes that they undergo in the atmosphere as well as their heterogeneous emissions introduce a challenge for accurately determining their optical properties, spatial distribution and climate effects (Bond et al., 2013; Zanatta et al., 2016; Saleh et al., 2018; Samset et al., 2018). Indeed, the effect of aerosols is one of the largest uncertainties in climate models (Szopa et al., 2021).

30 Of all LAA, black carbon (BC) is the most important aerosol warming agent due to its large mass absorption cross-section (Myhre et al., 2013; Szopa et al., 2021). The influence on the climate of absorbing organic LAA, either primary - emitted into the atmosphere, or secondary, produced in the atmosphere by physical and chemical processes, is also a large unknown ~~(e.g., Laskin et al., 2015; Rovira et al., 2025)~~ (e.g., Laskin et al., 2015; Rovira et al., 2025). Moreover, mineral dust, ~~which also absorbs sunlight and~~ contributes most to aerosol mass in the atmosphere and absorbs sunlight, also features quite large uncer-  
35 tainties in its climate effects (e.g., Kok et al., 2017, 2021a, b). The highest uncertainties are associated with the variable distribution of particle size in the atmosphere and the mineralogical composition, both of which are important parameters in the influence of dust on the net radiative forcing (Di Biagio et al., 2020; Adebisi and Kok, 2020; Huang et al., 2020; Kok et al., 2021a; Li et al., 2021). Mineral dust absorption is mainly driven by the composition of iron oxides (Sokolik and Toon, 1999; Lafon et al., 2006; Balkanski et al., 2007; Caponi et al., 2017; Di Biagio et al., 2019).

40 The most widely used instrumentation to determine aerosol absorption coefficients, especially in ambient measurements, are filter absorption photometers ~~(FP)~~ (Moosmüller et al., 2009): aethalometers (Hansen et al., 1984; Drinovec et al., 2015), particle soot absorption photometers (PSAP; Bond et al., 1999), continuous light absorbing photometers (CLAP; Ogren et al., 2017) and the multi angle absorption photometers (MAAP; Petzold and Schönlinner, 2004). Their working principle ~~is~~ is based on the continuous accumulation of the aerosol sam-  
45 ple on the filter, through which the attenuation of light in comparison with a blank filter is measured to derive absorption coefficients and the equivalent black carbon concentrations (eBC; Petzold et al., 2013). ~~FP feature two~~ Filter photometers feature three main artefacts that influence ~~the absorption determination: the~~ and hinder the correct determination of the absorption coefficients. The first is the filter loading effect ~~(FLE) for which many correction schemes have been developed~~ (Bond et al., 1999; Weingartner et al., 2003; Collaud Coen et al., 2010; Drinovec et al., 2015, 2017), ~~and the~~ cross-sensitivity to scattering of aerosol particles within the filter tape, which can also be corrected for, but requires additional scattering measurements (Arnott et al., 2005; Ogren et al., 2017; Yus-Díez et al., 2021). can be corrected using assumptions (Bond et al., 1999; Weingartner et al., 2003; Collaud Coen et al., 2010), or measurements (Drinovec et al., 2015, 2017). The

second is the amplification of absorption of light in the particles resulting from the scattering of light by the filter tape fibers, which is corrected by introducing a multiplicative multiple-scattering parameter C, describing the enhancement of absorption by the scattering of light in the filter matrix (Arnott et al., 2005; Ogren et al., 2017; Drinovec et al., 2015). The third effect is the scattering of light by the particles embedded in the filter, reducing the transmission of light through the sample-laden filter due to scattering which is misinterpreted as absorption (Yus-Díez et al., 2021; Drinovec et al., 2022). The three artefacts are treated as separate, even though they are somewhat co-dependent, as shown in the light-transport models (Müller et al., 2014).

The filter loading effect results in the loss of sensitivity of the instrument due to the increase in the sample load in the filter (Bond et al., 1999; Weingartner et al., 2003). Multiple algorithms for the compensation of the filter loading effect have been developed for different filter photometer models (Bond et al., 1999; Virkkula et al., 2007; Weingartner et al., 2003; Drinovec et al., 2015; Ogren et al., 2017). The newest aethalometer models (AE33 and latest versions) feature a correction with an integrated compensation algorithm using online measurements of the filter loading effect (Drinovec et al., 2015). In addition, the physical

properties of the sampled particles influence the multiple scattering of the collected particles within the filter (Weingartner et al., 2003; Lack et al., 2008; Virkkula et al., 2015; Drinovec et al., 2015; Yus-Díez et al., 2021), since particles with a higher single-scattering albedo produce an enhancement of the multiple scattering of light, increasing the apparent attenuation (Yus-Díez et al., 2021), and smaller particles have the ability of being deposited deeper inside the filter matrix, also enhancing the apparent attenuation measured by the filter photometers (Drinovec et al., 2022).

Filter photometers were designed for black carbon measurements (Gundel et al., 1984), but however, the measurement was interpreted at the same time as one concurrently as a value of the absorption coefficient (Hansen et al., 1982, 1984). Eventually, filter photometers were used also used to obtain the absorption coefficients for dust measurements (Fialho et al., 2005). FP sensitivity (Fialho et al., 2005, 2006; Di Biagio et al., 2017). The sensitivity of filter photometers depends on the depth at which particles are trapped in the filter matrix, as which differs across filter photometer models and the aerosol particle size. This is taken into account by the MAAP using a simple radiative transfer model that takes into account the backscattering of light at two angles (Petzold and Schönlinner, 2004), or observed in other filter photometers as the dependence of the multiple-scattering parameter C on the single scattering albedo and the size of the particles (Drinovec et al., 2022). In (Yus-Díez et al., 2021; Drinovec et al., 2022). Therefore, in order to use the filter photometers in dust measurements, the measurement needs to be characterized with a representative sample and its artefacts quantified, which requires a better characterization for soot-like particles, mineral dust samples and ambient measurements where these two types of aerosol species appear simultaneously.

Ultimately, reference absorption measurements are required to measure the absorption coefficient and correct for the FP filter photometer artefacts. This is especially important since the new European Air Quality Directive (PE-CONS 88/24) requires the measurement of BC concentrations by optical absorption methods (European Commission, 2024). An often-used method to obtain the absorption coefficient, especially for laboratory experiments, is the extinction-minus-scattering method, which is usually performed by Cavity Phase Shift Extinction analyzers (CAPS; Massoli et al., 2010; Modini et al., 2021). Extinction-minus-scattering-obtained absorption coefficients are fairly robust and mainly feature low uncertainties, however for

high single scattering albedo values, which are frequent in ambient measurements (Laj et al., 2020) and where the extinction is dominated by scattering, this methodology introduces very high uncertainties (Moosmüller et al., 2009; Singh et al., 2014), especially when combined with imperfect nephelometer truncation error correction of the total scattering coefficient (Modini et al., 2021).

There are two main methods that provide direct measurements of the absorption coefficient and avoid artefacts introduced by ~~FPs~~ filter photometers: photoacoustic spectrometry (PAS Arnott et al., 2003) and photothermal interferometry (PTI; Moosmüller and Arnott, 1996; Visser et al., 2020; Drinovec et al., 2022). Both are based on the heating of the aerosol sample by focusing light from an intensive source on it as it is drawn through a measurement chamber. The methods differ in the probe method: PAS uses an acoustic resonator and a microphone for detection, whereas PTI uses an interferometer and photodiodes. PAS can exhibit biases when the aerosol sample contains semi-volatile organic coatings or water, since the detected acoustic signal can be reduced by the latent heat of the material during evaporation of these substances upon heating (Arnott et al., 2003; Moosmüller et al., 2009). PTI and PAS have been found to agree when measuring soot particles coated with specific secondary organic matter (Kalbermatter et al., 2022). A novel traceably calibrated PTI instrument, the PTAAM-2λ (Haze Instruments, Slovenia) has been shown to provide accurate and precise aerosol absorption measurements for different aerosol particle compositions (Drinovec et al., 2022).

~~Furthermore, another established manner to obtain the absorption coefficient, especially for laboratory experiments, is the extinction-minus-scattering method, which is usually performed by Cavity Phase Shift Extinction analyzers (CAPS; Massoli et al., 2010; Modini et al., 2021). Extinction-minus-scattering-obtained absorption coefficients are fairly robust and mainly feature low uncertainties, however for high single scattering albedo values, where the extinction is dominated by scattering, this methodology introduces very high uncertainties (Moosmüller et al., 2009; Singh et al., 2014).~~

Filter photometers therefore require the use of a co-located reference absorption measurement for their calibration. Some studies have used either the extinction-minus-scattering method (Bond et al., 1999; Di Biagio et al., 2017) or another filter photometer, such as the ~~TAP~~ tricolor absorption photometer (TAP) in Laing et al. (2020) or more sophisticated filter photometers that measure the backscattering of light from the filter such as the MAAP (Yus-Díez et al., 2021) or the PP\_UniMI (Bernardoni et al., 2021; Ferrero et al., 2021) (Di Biagio et al., 2017; Yus-Díez et al., 2021) or the off-line Polar photometer of the University of Milano (PP\_UniMI; Bernardoni et al., 2021; Ferrero et al., 2021). Indeed, the MAAP is used as the reference instrument in the Aerosol, Clouds and Trace Gases Research InfraStructure (ACTRIS; ECAC-CAIS, 2022) guidelines to harmonize absorption coefficients from the dual-spot multi-wavelength aethalometer, the AE33 (Drinovec et al., 2015), across the ACTRIS network. However sophisticated these methods are, none truly measure the absorption coefficient, and all add an additional layer of uncertainty. Recently, Drinovec et al. (2022) used a traceably calibrated instrument based on PTI, the PTAAM-2λ, to calibrate the AE33 and the CLAP and quantify their cross-sensitivity to scattering artefact for aerosol mixtures of fine soot and ammonium sulfate.

We use absorption coefficients, measured by the novel PTAAM-2λ ~~and an~~, and the scattering coefficients, measured by the integrating nephelometer Aurora 4000, to fully quantify the artefacts of widely deployed filter photometers: the AE33, the CLAP and the pseudo-reference MAAP. For this purpose, we have performed chamber experiments with a wide variety of

**Table 1.** Sample classification and number of measurements per sample type. The absorption Ångström exponent (AAE) was derived from the PTAAM-2λ using 450 and 808 nm measurements, and the [single scattering albedo \(SSA\)](#) at 450 and 808 nm as a combination of the PTAAM-2λ and the nephelometer. Sediment mineral dust sample specific characteristics can be found in [González-Romero et al. \(2023, 2024a, b\); González-Romero et al. \(2025\)](#)[González-Romero et al. \(2023, 2024a, b\)](#), while other samples are either commercially available or specifically generated for this study. The SSA and the AAE are characteristic of the generated aerosol mineral dust samples, produced from the sediment samples.

| Group        | Region/type       | Samples          | Latitude (°) | Longitude (°) | n | AAE  | SSA <sub>450nm</sub> | SSA <sub>808nm</sub> |
|--------------|-------------------|------------------|--------------|---------------|---|------|----------------------|----------------------|
| Mineral dust | Sahara (Morocco)  | MOR Surf. random | 29.83        | -5.87         | 3 | 4.46 | 0.955                | 0.997                |
|              |                   | MOR 31           | 29.82        | -5.95         | 3 | 3.61 | 0.939                | 0.982                |
|              |                   | MOR 40           | 29.70        | -6.02         | 3 | 4.61 | 0.957                | 0.997                |
|              |                   | MOR 108          | 29.93        | -6.38         | 3 | 4.73 | 0.964                | 0.998                |
|              | Wadi Rum (Jordan) | JOR Surf. random | 29.74        | 35.38         | 5 | 4.83 | 0.956                | 0.998                |
|              |                   | JOR 50           | 32.49        | 38.03         | 3 | 4.77 | 0.965                | 0.997                |
|              |                   | JOR 46           | 31.69        | 36.96         | 3 | 5.26 | 0.972                | 0.999                |
|              | Mojave (USA)      | USA 21           | 35.54        | -115.41       | 3 | 4.46 | 0.964                | 0.998                |
|              |                   | USA 37           | 35.15        | -116.06       | 3 | 3.30 | 0.972                | 0.997                |
|              |                   | USA 49           | 35.14        | -116.32       | 3 | 4.24 | 0.980                | 0.999                |
|              | Icelandic dust    | ICE Surf. random | 64.92        | -16.78        | 4 | 1.94 | 0.971                | 0.992                |
|              |                   | ICE 95           | 63.60        | -18.35        | 4 | 2.31 | 0.949                | 0.988                |
|              |                   | ICE 105          | 63.67        | -19.93        | 3 | 2.16 | 0.944                | 0.987                |
|              |                   | ICE 108          | 64.46        | -20.86        | 3 | 2.47 | 0.970                | 0.990                |
|              | Quartz            | Qua              | -            |               | 3 | -    | 1.000                | 1.000                |
| Soot-like    | Diesel soot       | die              | -            |               | 2 | 1.24 | 0.459                | 0.660                |
|              | Propane soot      | pro              | -            |               | 2 | 1.03 | 0.465                | 0.610                |

aerosol types during a laboratory campaign, as well as ambient measurements in a polluted urban background atmosphere in Granada (Spain).

## 2 Methodology

This study showcases the analysis based on two distinct set-ups: a laboratory and an ambient campaign. Both campaigns had similar instrumental lay-outs, with the determination of particle absorption using filter photometers and a reference absorption measurement by the photo-thermal interferometer. Additional measurements of scattering and particle size distribution were performed at both campaigns. The experimental set-up at both campaigns can be found in Fig. 1. [To allow comparison between the instruments, all measurements are reported in the same conditions of standard temperature and pressure \(T=273.15 K and P=1013.25\).](#)

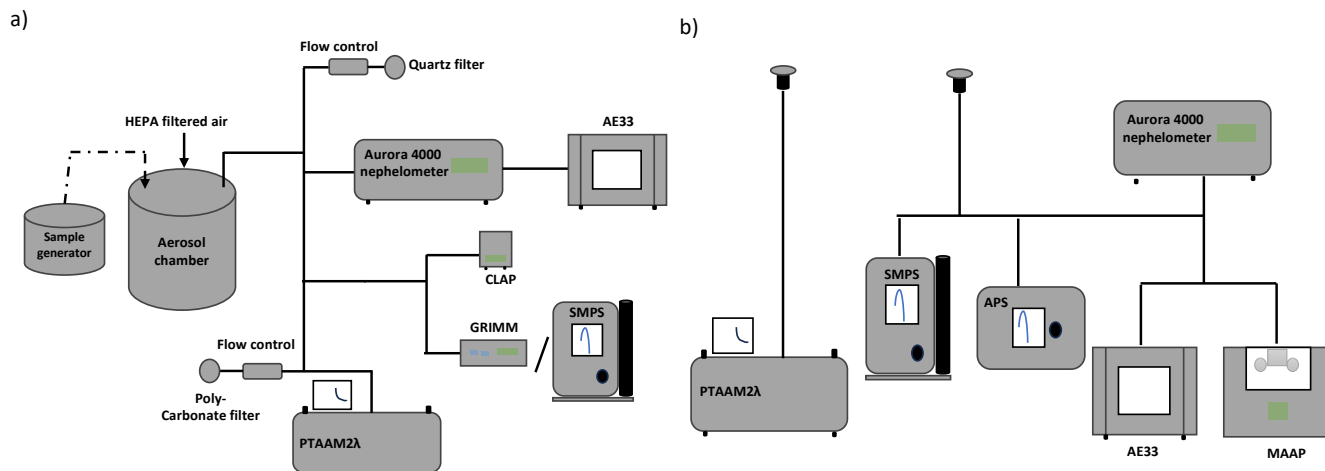

**Figure 1.** a) Laboratory set-up for measuring mineral dust airborne/combustion generated samples, and b) set-up at the UGR site for measuring ambient aerosol. The attenuation coefficients were measured by an AE33 (lab and ambient) and a CLAP (lab), reference absorption was measured with the PTAAM2λ. Scattering coefficients were obtained by the Aurora 4000 nephelometer for both campaigns. Particle size distribution was obtained either by an OPS (GRIMM 11-D) for dust particles or by an SMPS for soot-like particles during the laboratory campaign, and by an SMPS and an APS during the ambient campaign. Offline quartz fiber and polycarbonate filters were sampled with different flows.

## 2.1 Laboratory aerosol measurement

### 2.1.1 Samples: mineral dust, quartz, soot

Different samples of dust ~~and soot-like~~ aerosolized particles were measured in this study (cf. Table A1). ~~In addition, pure quartz dust (Sigma-Aldrich 342890-100G) was used as a purely scattering dust reference sample. Finally, samples with high BC~~ Mineral dust, which is the most abundant aerosol compound in the atmosphere by mass, with poorly constrained influence on the climate, features a small net cooling effect (Kok et al., 2023). BC particles, which are aggregate structures of graphene layers originated from the incomplete combustion of fossil fuel (Bond and Bergstrom, 2006), feature very high mass absorption cross-section values, and as such are the most important aerosol climate forcer (Bond et al., 2013; Szopa et al., 2021). Samples with high black carbon (BC) content: Euro-3 engine diesel soot and propane soot (Drinovec et al., 2022) were sampled. ~~In addition, pure quartz dust (Sigma-Aldrich 342890-100G) was used as a purely scattering dust reference sample.~~ Fig. S1 shows the CLAP filter spots as a visual reference for the different samples.

Bulk mineral sediment samples were collected at different emission areas across mid- and high-latitude deserts which are sources of major dust emissions (Sahara, Middle-East, Mojave and Ice-land). These samples were collected within the framework of the project FRontiers in dust minerAloG-ical coMposition and its Effects upoN climaTe (FRAGMENT; <https://cordis.europa.eu/project/rcn/214076/>)

factsheet/en). Mineral dust properties, such as size segregated composition and similar can be found in [González-Flórez et al. \(2023\)](#); [Panta et al. \(2023\)](#); [González-Romero et al. \(2023, 2024a, b\)](#); [González-Romero et al. \(2025\)](#) [González-Flórez et al. \(2023\)](#); [Panta et al. \(2023\)](#); [González-Romero et al. \(2023, 2024a, b\)](#). In this study, since the samples  
150 are collected with a relatively small spatial variability within a well-defined area of the broader dust emission area, we present the results for the overall emission area and not specifically for each of the individual samples.

Aerosol mineral dust samples were produced in the lab in a vortex generator similar to device described in (Moosmüller et al., 2012). Filtered compressed air was directed tangentially to produce a vortex. To remove the large particles the sample was collected from the center of the container. Mineral dust generated by several short bursts of compressed air was directed  
155 in a 120 l plastic barrel, which was then connected to the instruments and sampled until concentrations dropped to negligible levels. For each sample, between 2 and 4 experiments were performed with increasing concentrations.

### 2.1.2 Instrument set-up

Online reference absorption measurements were performed with a dual-wavelength photothermal aerosol absorption monitor PTAAM-2 $\lambda$  (Drinovec et al., 2022, ; Haze Instruments, Slovenia). PTAAM-2 $\lambda$  is based on a folded Mach-Zender interferom-  
160 eter which measures the difference in the optical path between the sample and reference interferometer arms. The resulting phase difference is directly proportional to the absorption coefficient of the aerosol sample. For this study a newer version of the instrument was used with pump lasers operating at 450 and 808 nm instead of 532 and 1064 nm used in Drinovec et al. (2022). The calibration procedure was identical to the one described in Drinovec et al. (2022): the 450 nm channel was calibrated with 1 ppm NO<sub>2</sub>, and for the 808 nm channel the calibration was transferred from 450 nm using polydisperse nigrosin particles and  
165 an absorption ratio  $b_{abs}(808)/b_{abs}(450) = 0.335$  calculated with a Mie model. For PTAAM-2 $\lambda$  the sources of uncertainties at 450 nm are: NO<sub>2</sub> amount fraction, NO<sub>2</sub> absorption cross section at 450 nm, scattering and absorbing gases, and stability of the instrument, resulting in the final absorption coefficient uncertainty 4.2% at 450 nm. At the longer wavelength, there are the additional uncertainties of the Mie calculation due to the complex nigrosin refractive index and size distribution, resulting in absorption coefficient uncertainty 6.2% at 808 nm. The uncertainty of the Ångström exponent is 10.4 % as it is independent  
170 of the NO<sub>2</sub> amount fraction and the NO<sub>2</sub> absorption cross section at 450 nm. More details and references can be found in the Table S1.

Measurements of attenuation were performed with two filter photometers, the Aethalometer AE33 (Magee Scientific/Aerosol, USA/Slovenia) and the continuous light-absorbing photometer (CLAP, Haze Instruments, Slovenia). The AE33 measures attenuation at seven wavelengths (370, 470, 520, 590, 660, 880 and 950 nm) and compensates the filter loading effect  
175 through an in-built algorithm (Drinovec et al., 2015). The CLAP measures the attenuation at 470, 529 and 653 nm, which were compensated for the filter loading using a Ogren et al. (2017)-like algorithm scheme. Both instruments use glass-fibre filter, the M8060 filter tape in the AE33, and the Azumi 371M filter in the CLAP. The CLAP filter was changed for every set of experiments for each sample. For comparison with the PTAAM-2 $\lambda$ , the AE33 data was interpolated from 370 and 470 to 450 nm, and from 660 and 880 to 808 nm using the absorption Ångström exponent. The CLAP data was extrapolated to 808 nm  
180 using the absorption Ångström exponent from CLAP measurements.

Aerosol particle size distribution measurements were performed using an optical particle spectrometer (GRIMM 11-D) for mineral dust samples ~~and~~, which measures the number of particles in 31 bins for bins with an optical diameter size ranging from 0.253 to 35.15  $\mu\text{m}$ . The particle size distribution for soot-like particles (diesel and propane) was measured with a scanning mobility parameter sizer (TSI model 393L75)~~for soot-like particles (diesel, propane), which measures the number of particles in 64 bins for particle mobility diameters ranging from 15.12 to 982.17 nm. Given the differences in the size range and type of diameter reported by each instrument, comparison for particle size dependence is performed in a qualitative manner.~~ Scattering measurements were obtained with an Aurora 4000 polar integrating nephelometer (Ecotech, Australia) measuring at 450 nm, 525 nm and 635 nm. The instrument was set to measure total and back-scattering coefficients and angular truncation errors were corrected applying Teri et al. (2022) correction schemes using the scattering Ångström exponent for the size distribution and refractive indexes used by Anderson and Ogren (1998) and Müller et al. (2011b).

The single scattering albedo values were derived by using the total scattering coefficients from the Aurora 4000 integrating nephelometer in combination with the PTAAM-2 $\lambda$  absorption coefficient with the nephelometer data extrapolated to 808 nm using the measured scattering Ångström exponent.

## 2.2 Ambient measurements

The ambient campaign was performed between 16 June and 24 August 2023 at at the University of Granada (UGR) urban background station (37.18°N, 3.58°W, 680 m asl), which is part of the AGORA Observatory. It is located in the city of Granada in Southern Spain. The main local source of aerosol particles is road traffic (Titos et al., 2014, 2017), with sporadic presence of biomass burning aerosol, specially in autumn and winter seasons (Titos et al., 2017; Casquero-Vera et al., 2021). Air-mass stagnation episodes are relatively frequent and favor the accumulation of pollution near the surface (Lyamani et al., 2012; Patrón et al., 2017). The city is located 200 km away from the African continent, and is frequently influenced by long-range transport of Saharan dust (Lyamani et al., 2010; Valenzuela et al., 2012a, b).

Particle number size distributions at UGR were measured with a scanning mobility particle sizer (SMPS, TSI Mod. 3082) and an aerodynamic particle spectrometer (APS, TSI Mod. 3321). The APS aerodynamic diameters, in the range of  $\sim 0.5$  to  $20 \mu\text{m}$ , were converted to mobility diameter following the procedure described by Khlystov and Pandis (2004). The aerosol particle density and shape factors used are based in those used for this station in previous studies (cf. Hess et al., 1998; Frank Wagner and Tegen, 2009; Sorribas et al., 2015). Total and back-scattering measurements were performed with the same Aurora 4000 nephelometer as during the laboratory measurements, to which the Teri et al. (2022) angular truncation correction was applied. The nephelometer was set up to measure at 7 different angles (0, 15, 30, 45, 60, 75 and 90 °), of which only the total scattering coefficient is used in this study.

Online measurements of attenuation coefficients were performed with an AE33. As for the laboratory measurements, the filter tape used was the M8060 and ~~FLE~~the filter loading effect was compensated with the AE33 internal algorithm. Furthermore, absorption coefficients at 637 nm were obtained with a multiple-angle absorption photometer (MAAP; Petzold and Schönlinner, 2004), and the Müller et al. (2011a) scheme was applied to correct for the difference between the reported ~~and true (670 nm) and true (637 nm)~~ instrument wavelength.

215 Reference absorption measurements were performed with a PTAAM-2 $\lambda$  using the same configuration as the one used in the laboratory campaign. For this campaign, the instrument uncertainty is the same, a 4% at the blue channel (450 nm) and a 6% at the infra-red channel (808 nm).

As in the laboratory campaign, the AE33 measurements were interpolated/extrapolated to the PTAAM-2 $\lambda$  wavelengths. Conversely, the PTAAM-2 $\lambda$  absorption was interpolated using the AAE to the MAAP wavelength.

## 220 2.3 Filter photometer artefacts

~~We have~~ Using a constant multiple scattering parameter to compensate the artefacts of the filter photometer measurements under scenarios with high single scattering albedo, samples have been shown to introduce a large overestimation of the absorption coefficients measured with aethalometers (Yus-Díez et al., 2021). To compensate for this cross-sensitivity to scattering of the filter photometers, we have applied the approach proposed by Yus-Díez et al. (2021) for the AE33, CLAP and MAAP, ~~with a more detailed description provided below. Indeed,~~ Yus-Díez et al. (2021) compensation scheme was an adaptation for the AE33 based of the Ogren et al. (2017) scheme for the CLAP, first developed by Bond et al. (1999).

Following these schemes, the ~~FP filter photometer~~ measured attenuation coefficient is compensated for the scattering of light by particles in the filter matrix to derive the corrected attenuation coefficient:

$$b_{atn-cor} = b_{atn} - m_s \cdot b_{sp}, \quad (1)$$

230 where  $b_{atn}$  is the measured attenuation coefficient by the instrument,  $m_s$  is the scattering artefact describing the cross-sensitivity to scattering of the measurement, and  $b_{sp}$  is the scattering coefficient of the sampled aerosol.

The absorption coefficient derived from these attenuation measurements is compensated for the multiple-scattering of light in the filter matrix loaded with the sample using a single multiplicative multiple-scattering parameter C:

$$b_{abs} = \frac{b_{atn-cor}}{C} \quad (2)$$

235 ~~There are two main methods to obtain the scattering artefact,  $m_s$ : i. as the slope between the reported absorption by the filter photometers versus the measured scattering artefact for a non-absorbing material, such as quartz (e.g., Drinovec et al., 2022), or ii. by combining eqs. (1) and (2) with the definition of the single scattering albedo,  $SSA = b_{sp}/(b_{sp} + b_{abs})$ , and fitting the resulting equation, as shown in eq. (9) of Yus-Díez et al. (2021).~~

$$C = C_{ref} + m_s \cdot \frac{SSA}{1 - SSA} \quad (3)$$

240 Unlike in previous studies (~~e.g. Bernardoni et al., 2021; Yus-Díez et al., 2021~~)(e.g., Bernardoni et al., 2021; Yus-Díez et al., 2021), here we use as reference an instrument that does not suffer from the size and scattering artefacts – the PTAAM-2 $\lambda$  (Drinovec

et al., 2022). As a consequence, we were able to determine the correction parameters without any additional artefacts from the reference absorption measurements. The pseudo-reference measurements used by Bernardoni et al. (2021) and Yus-Díez et al. (2021) were collected with with different filter photometers including polarimetric measurements with, PP UniMI. With PP UniMI and MAAP feature inversion algorithms that take into account the backscattering of light from the sample-laden filter to retrieve the absorption measurements, they are still subject to the main filter photometers artefacts. Here we use as reference an instrument that does not suffer from the size and scattering artefacts – the PTAAM-2λ (Drinovec et al., 2022). As a consequence, we were able to determine the filter photometer correction parameters without introducing additional artefacts from the (pseudo) reference measurements.

## 250 3 Results

Here we present the analysis of filter photometer (AE33, CLAP and MAAP) artefacts from both ~~the laboratory and the ambient campaigns~~ laboratory and ambient campaigns, using the traceably calibrated PTAAM-2λ as the aerosol absorption reference instrument.

As mentioned in section 2.1, the measurement of mineral dust samples during the laboratory experiment was performed as a two-stage process, first the chamber was filled with the airborne generated mineral dust sample, and then slowly emptied. Figure 2a shows the decay of the AE33 and CLAP attenuation coefficients and the PTAAM-2λ absorption coefficients as the chamber gets emptied. Due to the large initial concentrations, we maintain high values of the absorption/attenuation coefficients through-out the experiment – this is especially relevant for the 808 nm wavelength, since at this wavelength dust absorption is very low (Di Biagio et al., 2019). Nonetheless, the scatter of the data becomes quite large for absorption coefficients below 10 Mm<sup>-1</sup>. Furthermore, Fig. 2b shows the typical temporal variability of the attenuation (AE33) and absorption (PTAAM-2λ) coefficients during two typical days of the ambient campaign in Granada during a Saharan dust event over the region. It features high AAE values (above 2), with prominent contributions from local sources at the urban site. This is shown by the increase in the absorption (and decrease of AAE) during peak local emission hours (06:00 and 20:00 UTC) and the otherwise low absorption values (5/1.5 Mm<sup>-1</sup> at 450/808 nm) during midday due to the dilution within the atmospheric boundary layer.

### 265 3.1 Filter photometer cross-sensitivity to scattering

During the laboratory experiments ~~, we analyzed the FP scattering~~ we analyzed soot-like and dust samples. The soot-like particles feature single scattering albedo values below the threshold above which the scattering parameter parameter becomes important, therefore no correction for the cross-sensitivity to scattering is necessary and therefore performed herein (Yus-Díez et al., 2021). We analyzed the filter photometer scattering cross-sensitivity artefact by measuring quartz as a reference sample for purely scattering mineral dust ~~sample~~. Therefore, any measured attenuation by the filter photometer is the result of the scattering artefact, which in Fig. 3a is obtained as the slope of the attenuation vs. the scattering. The scattering artefact  $m_s$  at 450/808 nm for the AE33 was 3.0%/1.5% and 2.4%/0.9% for the CLAP (cf. Fig. 3a). Both the resuspended quartz and real-world mineral dust samples had similar particle size distributions (Fig. S2), so we have assumed that the magnitude of

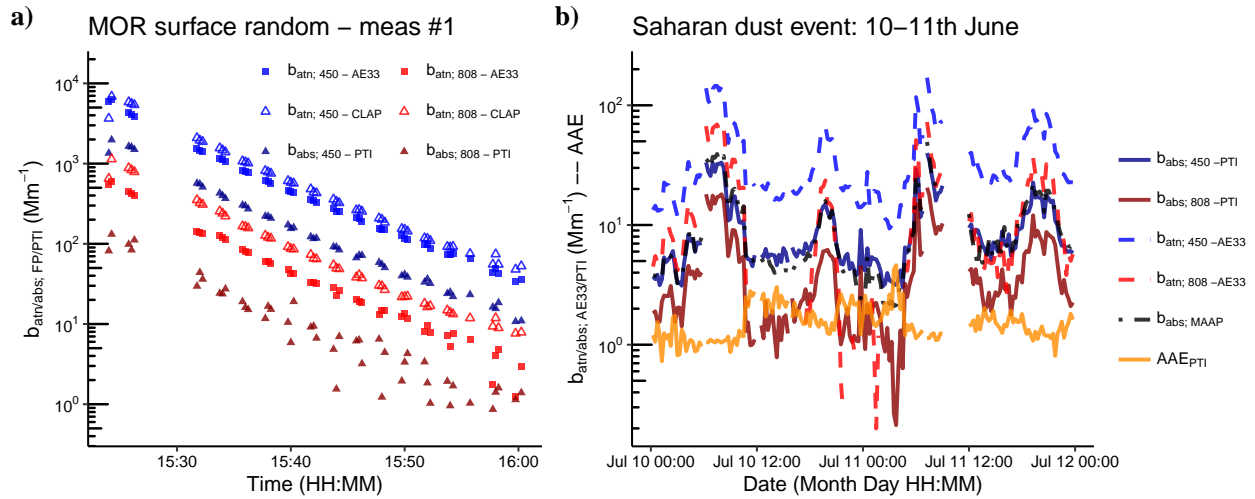

**Figure 2.** a) Example of the typical time evolution for a resuspended mineral dust sample, during the measurement of the *Morocco Surface Random sample* Saharan desert sample, "Morocco Surface random", Table A1, and described in further detail in González-Romero et al. (2023) - the attenuation coefficient ( $b_{\text{atn}}$ ) of the AE33 and CLAP, and the PTAAM-2 $\lambda$  absorption coefficient, and b) the temporal evolution of the absorption from the PTI, the absorption Ångström Exponent, and the multiple-scattering parameter for 2 Saharan dust event days during the campaign in Granada (time in UTC). Note the logarithmic scale on the y-axis.

the multiple-scattering artefact is the same for all samples. The scattering artefact values found herein for the AE33 were half the value and consistent with the decreasing trend found in Drinovec et al. (2022), where  $m_s$  was around 6% particles with a volume size mode of 122 nm, and within the range found in Drinovec et al. (2015) for the old filter type used in the AE33 (Pallflex "Fiberfilm" T60A20), 1.2-3.4%. The average CLAP scattering artefacts at 450 nm (2.4%) and at 808 nm (0.9%), were close to the wavelength-independent value 1.64% determined by Ogren et al. (2017). The values are summarized in Table 2.

The ambient campaign showed a highly heterogeneous aerosol composition with a multi-mode particle size distribution (Fig. S2), thus preventing the scattering artefact to be assumed to be the same as for the laboratory quartz samples. Consequently, to correct for the cross-sensitivity to scattering the AE33 data we have followed the approach proposed by Yus-Díez et al. (2021), where the scattering artefact is obtained from the fit of the ratio of attenuation, measured by the AE33, to the reference absorption coefficient, measured by PTAAM-2 $\lambda$ , as a function of single scattering albedo. Unlike for dust sample measurements, the presence of BC results in significant absorption in the infrared, resulting in a good fit not only at 450 nm but also at 808 nm. Figure 3(b) shows that the scattering artefact, obtained from the fit of the curve following eq. (9)–3, as in Yus-Díez et al. (2021), is 6.1% for 450 nm and 6.7% for 808 nm. These values were higher than those found in this study for the dust laboratory experiments, however similar to the ones found in Drinovec et al. (2022) for the 120 nm particles investigated therein. Compared with literature values, we have found considerably higher scattering artefact values for AE33 than at other measurement sites. Indeed, Yus-Díez et al. (2021) showed scattering artefacts of 1.6-4.9%. We attribute this difference to the use here of a direct reference instrument (the PTAAM-2 $\lambda$ ) with no artefacts instead of MAAP as done in Yus-Díez et al. (2021) (see Fig. S3

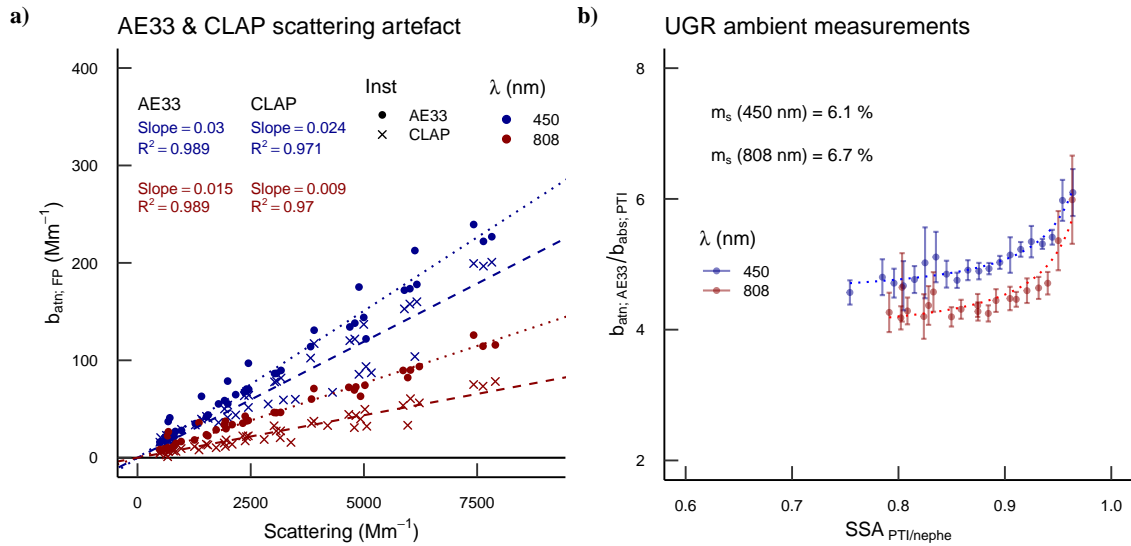

**Figure 3.** The filter photometer scattering artefact shown as a) the dependence of attenuation on the scattering coefficient in AE33 and CLAP during the laboratory campaign using resuspended non-absorbing Quartz samples; and b) during the the summer 2023 AGORA campaign in Granada as the fit of the ratio of the AE33 attenuation coefficient to PTAAM-2 $\lambda$  absorption coefficient vs. the single scattering albedo (SSA) at 450 nm and 808 nm - parameters from the fit of eq. (3), as in Yus-Díez et al. (2021). The error bars in the right panel showcase the upper and lower 95% confidence interval.

and section 3.3 below). Another reason for, smaller, discrepancies could be the different aerosol composition and particle size among different sites.

Although we have shown that the scattering artefact was higher during the ambient campaign than for the dust samples during the laboratory campaign, Fig. 4 shows that the relative contribution introduced by the scattering artefact to the total attenuation measured by filter photometers is higher for the pure dust samples in laboratory experiments, where SSA is higher (cf. Table A1). Furthermore, Fig. 4 shows that the relative contribution of the scattering artefact for pure dust samples increased with the wavelength, to values over 40% at the red (cf. Fig. S7). The increase with the wavelength is associated with the very low absorption by dust particles in the red and infrared wavelengths compared to scattering (Caponi et al., 2017). Fig. S6(a) shows that the relative contribution of scattering to attenuation remained constant through-out the experiment. The higher increase of the relative contribution of scattering to attenuation at 808 nm, although not as apparent, it was also a feature in Granada under low concentration scenarios (cf. Fig. S6(b)). However, during the ambient campaign, soot-like particles, which were the main absorbing particles, have a higher MAC, hence this effect was only observed for very low concentrations, when the absorption coefficient was below  $1 Mm^{-1}$  (cf. Fig. S6(b)), which is more frequent for the 808 nm wavelength.

**Table 2.** Scattering artefact,  $m_s$ , for both the Aethalometer AE33 (laboratory and ambient campaign) and the CLAP (only laboratory campaign) obtained as the dependence of attenuation on the scattering coefficient in AE33 and CLAP during the laboratory campaign using resuspended non-absorbing quartz samples; and during the the summer 2023 AGORA campaign in Granada as the fit of the ratio of the AE33 attenuation coefficient to PTAAM-2 $\lambda$  absorption coefficient vs. SSA at 450 nm and 808 nm - parameters from fit as in Yus-Díez et al. (2021). Figures with the fits for the AE33 and CLAP wavelengths can be found in Figs. S4-S5. The uncertainty reflects the 95% confidence interval of the applied fits.

|      |                | $m_s(\%)$      |                |
|------|----------------|----------------|----------------|
|      | $\lambda$ (nm) | Quartz dust    | UGR ambient    |
| AE33 | 370            | 4.2 $\pm$ 0.07 | 6.7 $\pm$ 0.57 |
|      | 450            | 3.0 $\pm$ 0.05 | 6.5 $\pm$ 0.37 |
|      | 470            | 2.8 $\pm$ 0.05 | 7.2 $\pm$ 0.41 |
|      | 520            | 2.5 $\pm$ 0.06 | 8.4 $\pm$ 0.54 |
|      | 590            | 2.2 $\pm$ 0.07 | 8.1 $\pm$ 0.62 |
|      | 660            | 1.9 $\pm$ 0.04 | 7.4 $\pm$ 0.43 |
|      | 808            | 1.5 $\pm$ 0.02 | 6.4 $\pm$ 0.31 |
|      | 880            | 1.4 $\pm$ 0.02 | 7.0 $\pm$ 0.34 |
|      | 950            | 1.3 $\pm$ 0.02 | 6.6 $\pm$ 0.47 |
| CLAP | 450            | 2.4 $\pm$ 0.06 |                |
|      | 470            | 1.9 $\pm$ 0.02 |                |
|      | 529            | 1.8 $\pm$ 0.02 |                |
|      | 653            | 1.3 $\pm$ 0.01 |                |
|      | 808            | 0.9 $\pm$ 0.02 |                |

### 3.2 Multiple-scattering parameter for filter photometers

Table 3 shows the multiple-scattering parameter, C, after correcting the attenuation coefficients for the cross-sensitivity to scattering for each of the sample types. The values have been obtained for each of the sample groups as the slope of the orthogonal fit of the attenuation coefficients corrected for the cross-sensitivity to scattering  $b_{atn-cor}$  (cf. eq. 1) vs. the reference absorption coefficients from the PTAAM-2 $\lambda$  (cf. Figs. S8-S24). It should be noted that due to the effect of interpolation/extrapolation from/to the FP-filter photometer or PTAAM-2 $\lambda$  wavelengths the C values reported at the FP-wavelengths vs filter photometer wavelengths vs. the PTAAM-2 $\lambda$  could vary. This effect is expected to be the highest for dust, since the AAE between 370 and 660 nm for dust is higher than between 660 and 950 nm. During the UGR ambient measurements, the uncertainty of the regression due to interpolation of the absorption coefficient to 637 nm using AAE derived from the measurements at the two PTAAM wavelength (450 and 808 nm) instead of the seven AE33 ones (307 - 950 nm) was 4%. The uncertainty of the fit is

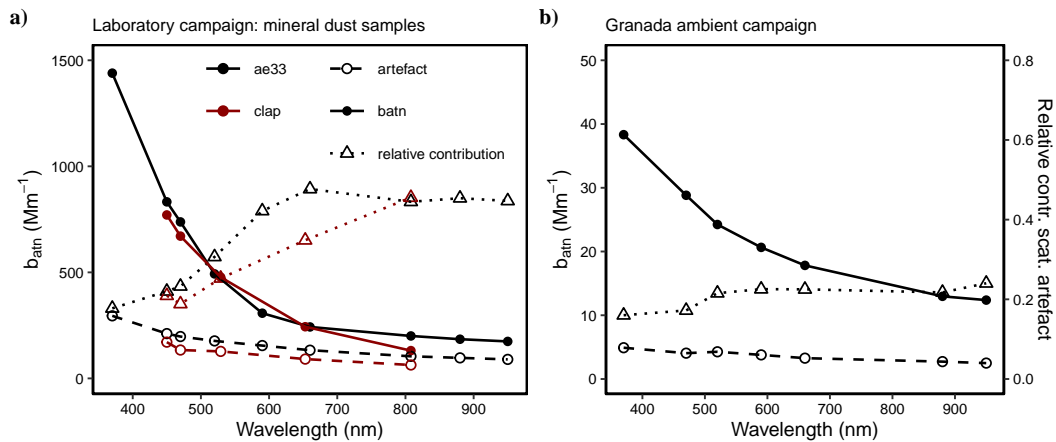

**Figure 4.** Dependence on the wavelength of the attenuation coefficient, the scattering artefact, and the relative contribution of the scattering artefact to the total attenuation measured by the AE33 and the CLAP (inter/extrapolated to 450 and 808 nm) for a) the laboratory campaign, and b) the ambient campaign in Granada.

shown by the  $R^2$  and 95% confidence interval range for each sample in Tables S2 and S3. This confidence interval is obtained by introducing the measurement error into the Deming regression fit by error propagation of the standard deviation and the instrument uncertainty.

The C of the dust samples at 450 nm was between 2.50 and 2.80 for the CLAP and between 2.74 and 3.13 for the AE33. The C for the AE33 is smaller than those provided by Di Biagio et al. (2017) for dust samples for aethalometer AE31. Table 3 shows that for all the mid-latitude deserts, the C decreases slightly between 370 and 660 nm, with an increase in the C value and its variability above 808 nm. Iceland dust, however, does not follow this pattern, and the C for 808, 880 and 950 nm, although slightly higher, had a lower variability (cf. Tables S2 and S3). This behavior is linked with the high contribution of the scattering artefact to the total absorption for all the dust samples, which is lower for Icelandic dust (Fig. S7), which could be linked to its higher absorption at these wavelengths (Baldo et al., 2023).

~~This high-variability of the fit is shown by the low  $R^2$  and the 95% confidence interval range for these samples, as can be seen in Indeed, Tables S2 and S3 .Therefore, the showcase how the high variability of the C values obtained for these higher wavelengths (808, 880 and 950 nm) cannot be relied on for the dust samples, since the high contribution of the scattering artefact to the total AE33 signal and the low correlation is related to the limitations of the compensation model (eq. 1 and 2). Here we link this with a probable a non-linearity in the cross-sensitivity to scattering due to second-order effects associated with the particle properties and the instrument design, visible only at the lower absorption values and when the relative scattering contribution to the measured attenuation is the highest.~~

Di Biagio et al. (2017) performed a similar study, albeit for an aethalometer AE31 (Magee Scientific, USA) which has been shown to have C values lower than those of the AE33 (Drinovec et al., 2015; Savadkoohi et al., 2023), where they (Di Biagio et al., 2017) measured reference dust absorption using the extinction-minus-scattering method using a CAPS PMex and

**Table 3.** Multiple-scattering parameter C for both the Aethalometer AE33 (laboratory and ambient campaign) and the CLAP (laboratory campaign) obtained as the orthogonal fit of their attenuation coefficients corrected for cross-sensitivity to scattering vs. the PTAAM-2 $\lambda$  absorption coefficients (Figs. S8-S24). Values have been reported at the reporting wavelengths of each FP-filter photometer (by inter- and extrapolation) and the wavelengths of the PTAAM-2 $\lambda$  at which they were measured (marked in bold). The lower and upper 95% confidence interval of the C and the  $R^2$  of the attenuation and absorption measurements used in the fit are shown in Tables S2 and S3. Given the high uncertainty of the measurements above 800 nm, we have marked them in italic in this table.

|                         | C    |      |      |      |      |      |           |           |           |      |      |      |      |           |  |
|-------------------------|------|------|------|------|------|------|-----------|-----------|-----------|------|------|------|------|-----------|--|
|                         | AE33 |      |      |      |      |      |           |           |           | CLAP |      |      |      |           |  |
| Sample                  | 370  | 450  | 470  | 520  | 590  | 660  | 808       | 880       | 950       | 450  | 470  | 529  | 653  | 808       |  |
| Icelandic dust          | 3.01 | 2.96 | 2.56 | 2.21 | 2.16 | 2.22 | 3.55-3.55 | 3.22-3.22 | 3.80-3.80 | 2.80 | 3.06 | 2.61 | 2.57 | 3.06-3.06 |  |
| Wadi Rum (Jordan)       | 2.04 | 3.03 | 2.90 | 2.32 | 1.56 | 1.69 | 7.50-7.50 | 6.08-6.08 | 8.03-8.03 | 2.50 | 2.70 | 3.32 | 2.40 | 5.08-5.08 |  |
| Sahara (Morocco)        | 1.83 | 3.13 | 3.10 | 2.90 | 1.92 | 1.93 | 5.39-5.39 | 4.29-4.29 | 5.46-5.46 | 2.54 | 2.49 | 2.78 | 2.00 | 1.92-1.92 |  |
| Mojave (USA)            | 2.37 | 2.74 | 2.61 | 2.20 | 1.81 | 2.02 | 4.26-4.26 | 3.99-3.99 | 4.75-4.75 | 2.58 | 2.49 | 2.57 | 2.37 | 3.29-3.29 |  |
| Propane Soot            | 3.55 | 4.08 | 4.04 | 3.92 | 4.03 | 3.75 | 3.95-3.95 | 3.83-3.83 | 3.77-3.77 | 5.10 | 5.22 | 5.19 | 4.68 | 4.26-4.26 |  |
| Diesel soot             | 5.73 | 6.25 | 6.01 | 5.61 | 5.48 | 5.25 | 5.27-5.27 | 5.19-5.19 | 5.23-5.23 | 6.79 | 7.68 | 6.30 | 5.83 | 5.80-5.80 |  |
| UGR - average           | 4.85 | 4.72 | 4.72 | 4.25 | 4.12 | 3.99 | 3.90      | 3.81      | 4.30      |      |      |      |      |           |  |
| UGR - urban             | 4.83 | 4.79 | 4.74 | 4.30 | 4.21 | 3.74 | 4.08      | 3.89      | 4.39      |      |      |      |      |           |  |
| UGR - urban + dust      | 4.93 | 4.59 | 4.69 | 4.15 | 3.90 | 3.74 | 3.76      | 3.59      | 4.12      |      |      |      |      |           |  |
| UGR - urban + wildfires | 4.55 | 4.13 | 4.45 | 3.98 | 3.85 | 3.50 | 3.71      | 3.47      | 4.17      |      |      |      |      |           |  |

a Nephelometer (model 3563, TSI Inc.) at 450 nm, and the extrapolated MAAP absorption coefficients at 660 nm. Di Biagio et al. (2017) multiple-scattering parameter for dust ranged between 3.64 and 5.12 for 450 nm and between 3.56 and 4.04 at 660 nm. Values of this parameter for dust at 450 nm in our study are much smaller: 2.74 to 3.13 at 450 nm and 1.69 to 2.22 at 660 nm. They also exhibit lower variability which is a combination of the lower variability of the particle size distribution in this study for dust, lower uncertainty due to cross-sensitivity to scattering due to different filter tape material (AE31 uses reinforced quartz tape) and the lower noise of the reference absorption instrument, since ~~the~~for the 450 nm the extinction-minus-scattering method can introduce high systematic uncertainties in the case of high SSA (Modini et al., 2021).

Two types of soot were analyzed: propane (mean volume particle diameter,  $D_p$ , of 341 nm) and diesel soot ( $D_p$  of 177 nm), for which the C for the AE33 at 450/808 nm was 4.08/3.95 and 6.25/5.27, respectively (cf. Table 3). The CLAP featured C values at 450/808 nm of 5.10/4.26 for propane soot and 6.79/5.80 for diesel soot. These C values are consistent with the values found in Drinovec et al. (2022) for similar diesel and propane soot samples, between 5.3 and 3.2 at 532 nm, and between 4.2 and 2.6 at 1064 m, for 100 and 500 nm volume size mode, respectively. There are some differences due to the difference in the measuring wavelength and the different flow used in the compared studies for the AE33. ~~The C~~Weingartner et al. (2003) studied the C values for an aethalometer AE30 (a prototype of the AE31), and comparison is limited to some extent, they found for diesel soot C values around 2.14 at 450 and 660 nm. These values need to be interpreted with caution. The aethalometer model AE31 uses quartz filter tape, which features significantly higher C values when compared to different AE33 filter

350 tapes, as shown in the original AE33 publication (Drinovec et al., 2015). Furthermore, Yus-Díez et al. (2021) showed important influence of the filter type in AE33 on the C parameter. The C value of 1.44 recalculated for the CLAP from parameters in Ogren et al. (2017), based on the experiments ~~with a PSAP~~ from Bond et al. (1999) on aerosol mixtures of pure nigrosin with pure ammonium sulfate using also a reference extinction minus scattering measurement, is clearly lower than the nigrosin and/or any soot mixture measured in this study and in Drinovec et al. (2022). Unlike for mineral dust samples, the goodness of the fit (Tables S2 and S3) was very good for both for both soot samples for the AE33 and the CLAP through-out the different wavelengths ( $R^2 > 0.95$ ). Furthermore, Table S4 summarizes the C and  $m_s$  parameters following Ogren et al. (2017) and Bond et al. (1999) nomenclature, i.e. K1 and K2 parameters.

During the ambient measurements at UGR, we found AE33 C values at 450/808 nm of 4.72/3.90 (cf. Table 3). These ~~values were very~~ C values for UGR are similar to the ~~propane soot measurements~~ laboratory measurements for the propane soot sample, and higher than those found by Drinovec et al. (2022) during a winter ambient campaign in Ljubljana, which were 3.28/2.57 at 532/1064 nm. Furthermore, the ~~C~~ obtained C at UGR (cf. Table 3) did not vary with the type of event affecting the site — urban background pollution, fresh urban pollution, a dust event, or globally transported wildfire smoke, as shown by the overlapping of values in most of the cases in Table S2. Dust events were determined using the Collaud Coen et al. (2010) methodology, dust forecasts and ~~PM~~ particulate matter concentration levels measured on-site. Wildfire events were identified through the CAMS global forecast tool. As shown in Table S2, the C for all the wavelengths showed an overall good agreement for all the wavelengths and conditions. Figure S2 shows that the volume particle size distribution during the urban background and the dust events (there were no APS measurements during the wildfire event) did not change significantly between the periods for the fine fraction below 400 nm, as previously shown in the measured urban background station (Casquero-Vera et al., 2020). However, the coarse fraction increases significantly during the dust events, associated to the advection of coarse particles from the Saharan dust outbreaks (Casquero-Vera et al., 2020). It is the combination of the absorbing soot-like particles ~~and the~~ (in the fine mode) and the coarser dust particles present during the campaign that influenced the C, but the small changes of their relative contribution (cf. Fig S2b) did not have an effect on the resulting C values.

The C parameter found in the literature for ambient AE33 measurements compared to an offline polar filter photometer (Yus-Díez et al., 2021; Bernardoni et al., 2021; Ferrero et al., 2021), showed values at 520 and 660 nm ranging between 2.2 and 3.6, which were lower than those found in this study during the ambient campaign. The ACTRIS guidelines recommend a wavelength independent C parameter for AE33 ambient measurements using the M8060 filter of 2.44, using the MAAP (an online polar filter photometer) as the pseudo-reference. Indeed, when using the MAAP as a pseudo-reference instrument, following Yus-Díez et al. (2021) approach we have obtained a C parameter at 637 nm of 2.62 via the fit of eq. (1) and of 2.68 through an orthogonal fit, with the 95% confidence interval ranging between 2.55 and 2.81 (cf. Fig. S3). Here, as in Bernardoni et al. (2021) and Drinovec et al. (2022), the shorter wavelengths also showed higher C values. The systematic differences between direct measurements with the PTAAM-2 $\lambda$  and the MAAP are discussed below in section 3.3.

### 3.2.1 Dependence on the particle size

Most remarkable features of Table 3 are the higher C values found for soot-like particles in comparison with dust particles. As shown in Drinovec et al. (2022), this is related with the size of the particles, with smaller particles showing higher C values. Figure 5 shows the variation with the size of the C values for the different sample types and the UGR campaign. It should be noted that the particle size of the dust samples was measured with an OPC, which measures the optical diameter, whereas for diesel and propane soot particle size was measured with an SMPS, which measures the mobility diameter. The conversion of the optical diameter to the mobility diameter would require assumptions on the complex refractive index, density, and most importantly, shape of mineral dust, as shown in Huang et al. (2020), which falls beyond the scope of this manuscript. During the UGR summer campaign particle size was obtained as the combination of the SMPS and the APS size distributions, reported in mobility diameter. Therefore, any comparison on the behavior with the particle size between dust and non-dust samples in Fig. 5 should be performed while keeping in mind the differences among these different diameters. Huang et al. (2020) showed that, for different assumptions of the complex refractive index and particle shape, optical diameters are on average 56% lower than geometric, which in turn are a 45% lower than aerodynamic diameters. . Following the same assumptions on particle density and sphericity used to convert the APS aerodynamic to mobility diameters from UGR site, will result in an overall shift by  $\sim 1.7$  of the diameters, thus resulting in a higher effective diameter, i.e., a positive shift of the corresponding data points in Fig. 5 in the x-axis.

Figure 5 shows that both the AE33 and CLAP feature C values that, albeit higher, exhibit the same trend as those found in Drinovec et al. (2022), where it was shown in the sub- $\mu\text{m}$  particle mobility diameter region, that CLAP measurements had a higher C than AE33 for the smaller particles, and vice-versa for the coarser particles. Here, we see that there is a considerable decrease of the C at 450/808 nm within the fine mode for soot, from 6.41/5.39 at 178 nm volume size mode ( $D_p$ ) to 4.77/4.76 at 341 nm for the AE33 and from 7.64/5.73 to 5.32/4.23 for the CLAP. At Granada, the C for the AE33 ranged between 4.64/4.47-3.97/3.55 at 450/808 nm, very similar to the coarser diesel soot particles measured in the laboratory. As the particles become coarse ( $>1 \mu\text{m}$ ), there is a significant decrease and consequent leveling-off in the parameter C, with values around 2.6-3.0 for both AE33 and CLAP at 450 nm.

It should be noted that at 808 nm, the C shows a high variability, as also shown in Table 3 for wavelengths over 660 nm. As can be observed in Fig. S25, the higher variability of the C for dust particles is mainly driven by the variability between the different samples and the higher relative contribution of the scattering by particles to the attenuation measured by the **FPfilter photometer**. Figure 5 shows that the CLAP features a higher dependency of C on the particle size, with higher values at smaller diameters (below 500 nm) and similar values for the broader region of larger diameters. It should be noted that the ambient Granada aerosol sample is an external mixture of a multi-mode aerosol particle size distribution (cf. Fig. S2) of fine soot-like particles, coarse dust particles and other fine and coarse particles. Therefore,  $D_p$  is only a proxy of the size of the total mixture that averages the effect of the absorbing fine soot-like with higher C values and the coarser dust particles with lower C values.

In brief, this section showcases the variation of the multiple scattering parameter for different aerosol types: mineral dust, soot-like particles and ambient urban aerosol. We have found that the key parameter is the source-dependent particle size, with

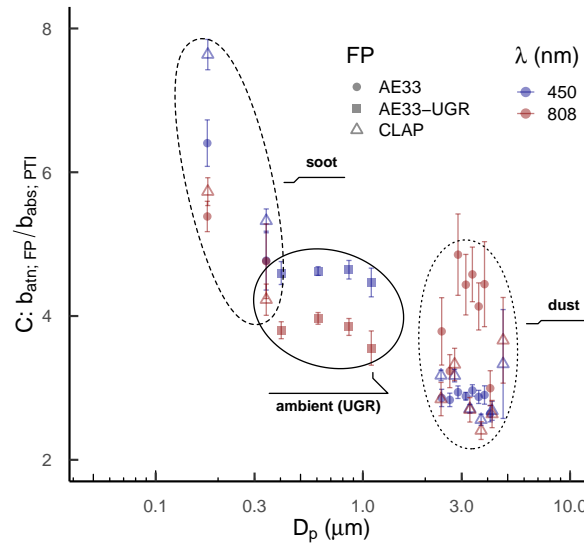

**Figure 5.** Dependence of the FP-filter photometer multiple-scattering parameter  $C$ , for AE33 and CLAP, on the volume particle diameter ( $D_p$ ). It should be noted that the particle size for the measurements obtained for soot and ambient measurements correspond to mobility diameter, whereas for mineral dust, the diameter is reported corresponds to optical diameter.  $C$  is obtained as the ratio of the FP-filter photometer attenuation coefficient, corrected for the scattering artefact, and the PTAAM-2 $\lambda$  absorption coefficient at 450 and 808 nm. AE33 and CLAP refer to the laboratory measurements, whereas AE33-UGR refers to the ambient measurements performed in Granada, Spain. The error bars in the right panel showcase the upper and lower 95% confidence interval.

smaller particles showcasing much higher values of the multiple scattering parameter  $C$ . Therefore, the comparison of our results with the literature showcases the impact of the variability introduced by different sources (and therefore size). When comparing these values with the previously published ones, it is important to take into account the use of different filter material in different (or same) filter photometer models. In this regard, this study provides a focused and in-detailed analysis of the behavior of the  $C$  parameter for different aerosol types with different particle size ranges in two most-used filter photometers –the Aethalometer AE33 and the CLAP.

### 3.3 MAAP artefacts

The MAAP is considered in many studies a pseudo-reference instrument that has been used to characterize AE31 and AE33 artefacts (e.g., Di Biagio et al., 2017; Yus-Díez et al., 2021; ECAC-CAIS, 2022). It measures the backscattering of light from the sample-laden filter at two angles that are used to parametrize the angular distribution of light, and correct for the (multiple) scattering of the light by particles within the filter through an internal algorithm (Petzold and Schönlinner, 2004). However, as shown by Valentini et al. (2020), the MAAP design limitations (only two angles measuring backscattered radiation) hinder its ability to fully represent the angular distribution of light scattered by the sample-laden filter. Valentini et al. (2020) shows that

the MAAP-derived absorption coefficient differs by 14% from the one provided by the higher angular resolution PP\_UniMI  
 430 (Vecchi et al., 2014).

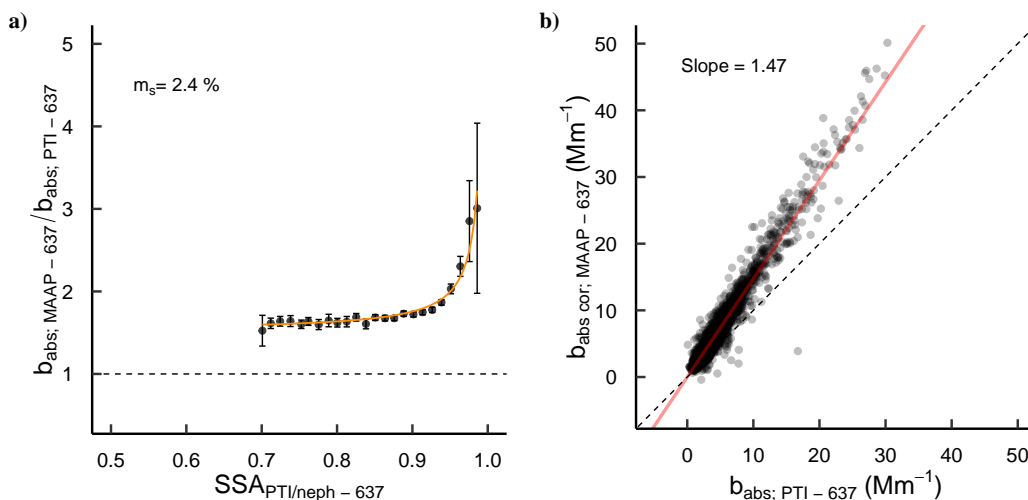

**Figure 6.** a) Evaluation of the cross-sensitivity to scattering for the MAAP, through the ratio of the MAAP and PTAAM-2λ absorption dependence on SSA, and b) relationship between the MAAP absorption corrected for the scattering artefact vs. the PTAAM-2λ absorption. The error bars represent the upper and lower 95% interval confidence of the measurements within the bins.

Figure 6 shows the ratio of the MAAP-derived absorption coefficient and the the absorption coefficient measured by PTAAM-2λ changing with the ambient SSA, all at 637 nm. It shows overestimation by the MAAP relative to the traceably-calibrated PTAAM-2λ: a clear deviation of the absorption coefficients ratio from 1 at low SSA, as well as a large increase for the MAAP absorption coefficient relative to the PTAAM-2λ at SSA values above 0.95. The result of the fit showcases  
 435 an artefact – cross-sensitivity to scattering, by the MAAP of  $m_s$  of 2.4%. Although it is 2.5 times lower than what has been found for the same period for the AE33 (Fig. 3b) and Table 2, it is still remarkable, since for the highest SSA measured, the MAAP absorption was more than double the one measured with the PTAAM-2λ. After correcting the MAAP absorption for its cross-sensitivity to scattering (following eq. (1), but for  $b_{\text{abs}}$  (MAAP) instead of  $b_{\text{atn}}$ ), Fig. 6b shows a 47% overestimation of the MAAP absorption values in comparison with the PTAAM-2λ reference measurements. We quantified the uncertainty associated to the interpolation of the PTAAM absorption coefficients to the MAAP wavelength at 637 nm. We compare the two-wavelength PTAAM interpolation with the use of the 7 wavelength fit from the calibrated AE33 (cf. section 3.2) - the difference of the MAAP absorption overestimation would increase for 4% using this alternative.

Similarly to the AE33 and the CLAP, a dependence on the particle size in the ratio between MAAP-derived absorption coefficient and the reference one was observed. However, the particle diameter did not present such a wide size range as  
 445 during the laboratory experiments, hence conclusions are limited (Fig. S26). In this regard, Fig. S5 from Romshoo et al. (2022) showed that the MAAP and AE33 (harmonized to the MAAP) absorption ratio to extinction-minus-scattering measurements

as a reference also had ratio between 1 and 1.5 for aerosols with a volume mean diameter below 100 nm, and that it converged towards 1 with increasing particle size, especially for particles with a volume mean diameter above 100 nm. Similar as in our study, Romshoo et al. (2022) shows that the decrease of the ratio with size is more pronounced for the AE33 than for the MAAP.

The presented cross-sensitivity to scattering artefact and multiple-scattering parameter values for MAAP and AE33 have large implications for the reporting of absorption coefficient in ambient measurement networks. For example, the MAAP deployed at Granada was part of Savadkoobi et al. (2023) as an effort to harmonize equivalent Black Carbon (eBC) AE33 measurements across Europe following the ACTRIS guidelines (Müller and Fiebig, 2021). These guidelines used the MAAP as a pseudo-reference instrument, and measured the deviation between the AE33 and MAAP eBC under different scenarios. This deviation was parametrized with the ACTRIS harmonization factor ( $H^*=1.76$ ; ECAC-CAIS, 2022), a multiplicative parameter to compensate the AE33 measurements across different measurement sites across the ACTRIS network. This  $H^*$  factor is computed as:  $H^* = eBC_{AE33} * \sigma_{AE33} / b_{abs,MAAP}$ , where  $eBC_{AE33}$  and  $\sigma_{AE33}$  are the AE33 reported black carbon concentration and the default AE33 MAC, respectively, interpolated to the MAAP wavelength, and  $b_{abs,MAAP}$  is the absorption coefficient provided by the MAAP.

Following the methodological approach proposed by the ACTRIS guidelines (ECAC-CAIS, 2022), we have obtained a Granada-specific  $H^*=1.89$  (Fig. S27), and 95% confidence interval ranging between 1.86 and 1.92, which is about a 7% higher than the ACTRIS value. This difference can be explained by the different aerosol sample measured as well as by the instrument inter-variability. Therefore, to properly correct the AE33 measurements using the MAAP as a pseudo-reference instrument, the additional deviation factor of 1.47 between the MAAP and the PTAAM-2 $\lambda$  has to be introduced into the harmonization factor to account for the artefacts of both instruments, increasing the  $H^*$  to  $1.76 \cdot 1.47 \simeq 2.6$ . The variability of this additional factor needs to be investigated, as we have shown it is dependent on the correction for SSA effects.

This overestimation by the MAAP, then propagated to the AE33 measurements (cf. Fig. S3), results in a significant overestimation of the eBC, Mass Absorption Cross-section (MAC) and absorption enhancement ( $E_{abs}$ ) values reported for measurements that used either instrument (~~e.g. Zanatta et al., 2016; Yus-Díez et al., 2022; Savadkoobi et al., 2023~~) (e.g., Zanatta et al., 2016; Yus-Díez et al., 2022; Savadkoobi et al., 2023). Indeed, the MAC reported in Zanatta et al. (2016) for MAAP was higher (1.47 on average) than with the PSAP-ITM, however the sites backgrounds were not strictly comparable.

An overestimation of the MAAP measurements when compared with the PTAAM-2 $\lambda$  absorption of 1.41 has also been found during the laboratory experiments performed within the framework of the stanBC project (European Partnership on Metrology; <https://stanbc.com>), which aims to provide a methodology to standardize the measurement of the aerosol absorption coefficient, BC and eBC from ~~FP-filter photometer~~ measurements and the manuscript is in preparation. In addition to laboratory experiments, further ambient campaigns where the PTAAM-2 $\lambda$  is deployed should be performed to provide further details on the effects that influence the sensitivity and performance of filter photometers in general, and the MAAP as a pseudo-reference in particular.

#### 4 Comparison of multiple scattering parameter values and harmonization using reference absorption measurement

This study quantifies the effect of two main aerosol properties affecting the filter photometer multiple scattering parameter and its cross-sensitivity to scattering: the particle single scattering albedo and their size distribution. Furthermore, it highlights the differences in measurements of the different aerosol types and the differences featured in the measurements by different filter photometers, the AE33, the CLAP and the MAAP, and compares the results with the published values.

Table 4 features the multiple scattering parameters for the different filter photometers used and referenced in this study for comparable wavelengths when possible. We have also included the methodology/instrument used for the reference absorption measurement, which is highly influential as shown in section 3.3. We have separated the values by instrument model and filter type, and moreover, if the study provided a differently parametrized compensation factor, either  $H^*$  for the AE33 aethalometer harmonization factor ECAC-CAIS (2022) or  $K_1$  for the PSAP/CLAP, we have converted this value to a  $C$  that follows Eq. (2). The relationship between the ACTRIS harmonization factor,  $H^*$ , and the  $C$  is such that:  $C = C_f \cdot H^*$ . Similarly,  $K_2 = 0.85 C$ .

As discussed in the previous sections, the CLAP  $C$  value found in this study for soot, although slightly higher, agrees well with the values found by Drinovec et al. (2022), which are much higher than those used by Ogren et al. (2017) and determined by Bond et al. (1999) for a Particle Soot Absorption Photometers (PSAP, upon which the CLAP design is based). The results for the aethalometer AE31 show a high degree of variation of the  $C$  with the method used for the reference absorption and the sample type (Weingartner et al., 2003; GAW-WMO, 2016; Di Biagio et al., 2017; Bernardoni et al., 2021). Similarly, the AE33 shows highly heterogeneous  $C$  values for the same sample types and reference absorption methods. Indeed, for ambient measurements, a  $C$  of 2.45-2.64 is found when using the MAAP as a reference (this study included), and a  $C$  value of 3.21-3.37 when using the more accurate PP UniMi. However, these  $C$  values are lower than those found by using a true absorption reference, the PTAAM-2 $\lambda$ , which shows  $C$  values in the infrared of 3.99. As shown in section 3.3, this difference is the result of the artefact introduced by the use of a filter photometer, the MAAP, as a reference instrument for absorption. When comparing the results from this study with Drinovec et al. (2022) measurements for soot particles, we obtain a good agreement both in the average values and in the dependency of  $C$  on SSA and the particle size diameter.

There is a notable lack of published references for the same type of filter photometers using different filter tapes and mineral dust samples. The study performed by Di Biagio et al. (2017) is similar, but using a different model, the AE31. They present a high variability of  $C$  values, depending on the method used for reference absorption and sample type. Our results for Saharan dust at 450 nm,  $\sim 3.1$ , show lower values compared to those found by Di Biagio et al. (2017) at 450 nm,  $\sim 4.5$ , where they used extinction-minus-scattering as reference absorption. However, rescaling the AE31 values using concurrent AE31 and AE33 measurements from Drinovec et al. (2015) using the 1.47 factor, we obtain values which agree much better, noting that the rescaling value is most certainly sample dependent.

#### 5 Conclusions

**Table 4.** Multiple scattering parameter values from this work and the literature for different instruments, filter types and samples. The filter tape multiple scattering parameter provided by the manufacturer is referred to as  $C_f$ ,  $H^*$  is the ACTRIS harmonization factor  $C = C_f \cdot H^*$ .  $K2$  is the CLAP/PSAP factor as in Ogren et al. (2017) based on the Bond et al. (1999) correction scheme for the PSAP, and calculated as  $K2 = 0.85 C$ . For a better comparison all the multiple scattering parameters are converted to  $C$ , which is the ratio between the attenuation coefficient measured by the filter photometers and the absorption coefficient by the reference instrument. The MAAP harmonization factor  $H^*$  (in bold) is derived from the comparison of the MAAP absorption and the reference absorption measurements.

| Instrument                                                  | Reference abs   | Sample              | Wavelength (nm) | $H^*/K2$           | $C$                     | Reference                        |
|-------------------------------------------------------------|-----------------|---------------------|-----------------|--------------------|-------------------------|----------------------------------|
| <u>PSAP - Pallflex</u>                                      | <u>EMS</u>      | <u>Soot</u>         | <u>550</u>      | <u>1.22</u>        | <u>1.44</u>             | <u>Bond et al. (1999)</u>        |
| <u>CLAP - Azumi</u>                                         | <u>PSAP</u>     | <u>Soot</u>         |                 | <u>1.70</u>        | <u>2.00</u>             | <u>Ogren et al. (2017)</u>       |
|                                                             | <u>PTAAM-2λ</u> | <u>Soot</u>         | <u>532</u>      |                    | <u>2.9-5.5</u>          | <u>Drinovec et al. (2022)</u>    |
|                                                             | <u>PTAAM-2λ</u> | <u>Diesel Soot</u>  | <u>653</u>      |                    | <b><u>5.83</u></b>      | <b><u>This study</u></b>         |
|                                                             | <u>PTAAM-2λ</u> | <u>Propane Soot</u> | <u>653</u>      |                    | <b><u>4.68</u></b>      | <b><u>This study</u></b>         |
|                                                             | <u>PTAAM-2λ</u> | <u>Saharan Dust</u> | <u>653</u>      |                    | <b><u>2.00</u></b>      | <b><u>This study</u></b>         |
| <u>AE31</u><br><u><math>C_f = 2.14</math></u>               | <u>EMS</u>      | <u>Soot</u>         |                 |                    | <u>2.14</u>             | <u>Weingartner et al. (2003)</u> |
|                                                             | <u>EMS/MAAP</u> | <u>Dust</u>         | <u>450/660</u>  |                    | <u>4.5/4.1</u>          | <u>Di Biagio et al. (2017)</u>   |
|                                                             | <u>MAAP</u>     | <u>Ambient</u>      |                 |                    | <u>3.5</u>              | <u>GAW-WMO (2016)</u>            |
|                                                             | <u>MAAP</u>     | <u>Ambient</u>      | <u>660</u>      |                    | <u>3.43</u>             | <u>Bernardoni et al. (2021)</u>  |
|                                                             | <u>PP UniMi</u> | <u>Ambient</u>      | <u>660</u>      |                    | <u>4.30</u>             | <u>Bernardoni et al. (2021)</u>  |
| <u>AE33 - M8020 (TFE)</u><br><u><math>C_f = 1.57</math></u> | <u>MAAP</u>     | <u>Ambient</u>      | <u>637</u>      |                    | <u>3.36</u>             | <u>Drinovec et al. (2015)</u>    |
|                                                             | <u>MAAP</u>     | <u>Ambient</u>      |                 | <u>2.21</u>        | <u>3.46</u>             | <u>ECAC-CAIS (2022)</u>          |
|                                                             | <u>MAAP</u>     | <u>Ambient</u>      | <u>637</u>      |                    | <u>2.29</u>             | <u>Yus-Diez et al. (2021)</u>    |
| <u>AE33 - M8060</u><br><u><math>C_f = 1.39</math></u>       | <u>MAAP</u>     | <u>Ambient</u>      |                 | <u>1.76</u>        | <u>2.45</u>             | <u>ECAC-CAIS (2022)</u>          |
|                                                             | <u>MAAP</u>     | <u>Ambient</u>      | <u>637</u>      |                    | <u>2.44</u>             | <u>Yus-Diez et al. (2021)</u>    |
|                                                             | <u>MAAP</u>     | <u>Ambient</u>      | <u>660</u>      |                    | <u>2.64</u>             | <u>Bernardoni et al. (2021)</u>  |
|                                                             | <u>MAAP</u>     | <u>Ambient</u>      | <u>637</u>      | <b><u>1.89</u></b> | <b><u>2.59</u></b>      | <b><u>This study</u></b>         |
|                                                             | <u>PP UniMi</u> | <u>Ambient</u>      | <u>660</u>      |                    | <u>3.21</u>             | <u>Yus-Diez et al. (2021)</u>    |
|                                                             | <u>PP UniMi</u> | <u>Ambient</u>      | <u>660</u>      |                    | <u>3.37</u>             | <u>Bernardoni et al. (2021)</u>  |
|                                                             | <u>PTAAM-2λ</u> | <u>Ambient</u>      | <u>532</u>      |                    | <u>3.28</u>             | <u>Drinovec et al. (2022)</u>    |
|                                                             | <u>PTAAM-2λ</u> | <u>Soot</u>         | <u>532</u>      |                    | <u>3.2-5.3</u>          | <u>Drinovec et al. (2022)</u>    |
|                                                             | <u>PTAAM-2λ</u> | <u>Ambient</u>      | <u>660</u>      |                    | <b><u>3.99</u></b>      | <b><u>This study</u></b>         |
|                                                             | <u>PTAAM-2λ</u> | <u>Diesel Soot</u>  | <u>660</u>      |                    | <b><u>5.25</u></b>      | <b><u>This study</u></b>         |
|                                                             | <u>PTAAM-2λ</u> | <u>Propane Soot</u> | <u>660</u>      |                    | <b><u>3.75</u></b>      | <b><u>This study</u></b>         |
|                                                             | <u>PTAAM-2λ</u> | <u>Saharan Dust</u> | <u>450/660</u>  |                    | <b><u>3.13/1.93</u></b> | <b><u>This study</u></b>         |
| <u>MAAP</u>                                                 | <u>EMS</u>      | <u>Soot</u>         |                 | <u>1.1 – 1.3</u>   |                         | <u>Romshoo et al. (2022)</u>     |
|                                                             | <u>PTAAM-2λ</u> | <u>Soot</u>         | <u>637</u>      | <b><u>1.47</u></b> |                         | <b><u>This study</u></b>         |

~~In this study we have~~ We have characterized the multiple-scattering artefacts of the most widely used filter photometers (FP) during a laboratory and an ambient campaign where the traceably-calibrated reference instrument for absorption, the dual-wavelength photothermal interferometer, PTAAM-2 $\lambda$  was deployed. The investigated ~~FPS were: an~~ filter photometers were: the aethalometer AE33 and ~~a~~ the continuous light absorbing photometer (CLAP) during the laboratory campaign, and ~~an~~ the AE33 and ~~a~~ the multi-angle absorption photometer (MAAP) during the ambient campaign. Mineral dust and soot-like samples were analyzed during the laboratory campaign, whereas the ambient campaign was performed during summer at an urban station in Granada (UGR) with varying composition of urban and regional aerosols, rich in soot and dust.

520 We have determined the cross-sensitivity to scattering due to coarse dust samples using a non-absorbing quartz sample. The parameter  $m_s$  is lower for the CLAP than the AE33, which is linked with the instrument design, with values range 3.0/1.5% at 450/808 nm for the AE33 and 2.4/0.9% at 450/808 nm for the CLAP. Furthermore, we have derived the cross-sensitivity to scattering at the urban background station, where the AE33 values 6.1/6.7% at 450/808 nm but with larger values around 8% in the mid-visible range. The larger scattering artefact found at the UGR is associated to the presence of finer particles, which  
525 result in a higher cross-sensitivity to scattering.

The sample variability in this study has enabled the study of the dependence of the multiple-scattering parameter, C, across a wide range of particle sizes. We have found that the multiple-scattering parameter C for both CLAP and AE33 decreases sharply with size within the fine fraction, and levels-off for coarse particles. As a result, the finer samples feature C values at 450/808 nm for the AE33 (CLAP) that range between 4.08/3.95 (5.10/4.26) for propane soot and 6.25/5.27(6.79/5.80) for  
530 diesel soot. For the mineral dust samples, the C ranged between 2.74 and 3.13 for the AE33 and between 2.50 and 2.80 for the CLAP at 450 nm. At UGR, the aerosol particle composition is a mixture of local/regional ~~emissions~~ contributions and dust, which results in a particle size in-between the soot and the mineral dust lab samples with a value of 4.72/3.95 at 450/808 nm.

Overall, the multiple-scattering parameters C, found in this study for both the AE33 and the CLAP were higher than those presented in previous studies, where filter photometers as the MAAP or similar are used as a reference. Here, thanks to the  
535 co-located MAAP and PTAAM-2 $\lambda$  measurements during the ambient campaign in Granada, we have shown that the MAAP absorption coefficients overestimate the absorption by ~~a~~ 47%. Moreover, despite the MAAP's more complex design and absorption retrieval scheme, we have found a cross-sensitivity to scattering of 2.4%.

This study provides a comprehensive analysis on the multiple-scattering compensation parameter, C, for the widely used AE33 and CLAP filter photometers, as well as first characterization of the pseudo-reference MAAP. It provides the platform  
540 for accurately compensating the ~~FP-derived~~ filer photometer-derived aerosol absorption coefficients, highlights the importance of correcting for scattering artefact, and the need for the knowledge of the particle sizes. Finally, it showcases the need for reference absorption measurements and the re-evaluation of previous reports on absorption coefficients and mass absorption cross-sections based on the MAAP.

*Code and data availability.* The code and data used for this manuscript can be accessed upon request to the author.

**Table A1.** [Summary of the different acronyms used through-out the manuscript](#)

| <a href="#">Acronym</a>       | <a href="#">Description</a>                                             |
|-------------------------------|-------------------------------------------------------------------------|
| <a href="#">AAE</a>           | <a href="#">Absorption Ångström Exponent</a>                            |
| <a href="#">AE33</a>          | <a href="#">Multi-wavelength Aethalometer Model AE33</a>                |
| <a href="#">AE31</a>          | <a href="#">Multi-wavelength Aethalometer Model AE31</a>                |
| <a href="#">APS</a>           | <a href="#">Aerodynamic Particle Spectrometer</a>                       |
| <a href="#">C</a>             | <a href="#">Multiple scattering parameter</a>                           |
| <a href="#">CLAP</a>          | <a href="#">Continuous Light Absorption Photometer</a>                  |
| <a href="#">λ</a>             | <a href="#">Wavelength (nm)</a>                                         |
| <a href="#">MAAP</a>          | <a href="#">Multi Angle Absorption Photometer</a>                       |
| <a href="#">m<sub>s</sub></a> | <a href="#">Cross-sensitivity to scattering artefact parameter</a>      |
| <a href="#">OPC</a>           | <a href="#">Optical Particle Counter</a>                                |
| <a href="#">PTAAM-2λ</a>      | <a href="#">Dual-wavelength photothermal aerosol absorption monitor</a> |
| <a href="#">PTI</a>           | <a href="#">Photo thermal interferometry</a>                            |
| <a href="#">SSA</a>           | <a href="#">Single Scattering Albedo</a>                                |
| <a href="#">SMPS</a>          | <a href="#">Scanning Mobility Parameter Sizer</a>                       |
| <a href="#">UGR</a>           | <a href="#">University of Granada</a>                                   |

550 *Author contributions.* LD, GM, GT, LAA and JYD conceived and designed the study. LD performed the laboratory campaign measurements. AGR, JYD, XQ and CPGP were involved in the field campaigns that collected the bulk mineral dust samples. GT, LAA, EB, DP, AC, LD, GM, JYD were involved in the installation, operation, maintenance and calibration of the instruments before, during, and/or after the campaigns. JYD processed the data, and LD, GM and JYD prepared the manuscript. All co-authors contributed to the preparation and the scientific discussion of the manuscript, and reviewed it.

*Competing interests.* LD and GM are employed by Haze Instruments d.o.o., the manufacturer of PTAAM-2λ. Other authors declare no potential conflict of interest.

*Acknowledgements.* This work was supported by the European Union’s Horizon Europe research and innovation programme under the Marie Skłodowska-Curie Postdoctoral Fellowship Programme, SMASH is co-funded by the Republic of Slovenia and the European Union from the

555 European Regional Development Fund under the grant agreement No. 101081355. We acknowledge co-funding by Slovenian Research and  
Innovation Agency programs P1-0385 "Remote sensing of atmospheric properties" and I-0033 "Infrastructural program of the University  
of Nova Gorica" [and projects V1-2373, L1-4386, L2-4485](#), the EURAMET/Horizon Europe project stanBC (22NRM02), and ESA project  
"Support to the Aeolus Validation and Calibration through Airborne Aerosol In-situ Observations in the Tropics" (000131931/20/NL/FF/an).  
The dust samples were obtained through field campaign funded by the European Research Council under the Horizon 2020 research and in-  
560 novation programme through the ERC Consolidator Grant FRAGMENT (grant agreement no. 773051) and the AXA Research Fund through  
the AXA Chair on Sand and Dust Storms at BSC. Ambient measurements at UGR urban station were supported by: European Union's Hori-  
zon 2020 research and innovation program through ACTRIS.IMP (grant agreement No. 871115) and ATMO-ACCESS (grant agreement No.  
101008004); by the Spanish Ministry of Science and Innovation through the projects ELPIS (PID2020-12001-5RB-I00), EQC2019 006423-  
P, NUCLEUS (PID2021-128757OB-I00), MICIU/AEI/10.13039/501100011033; and by the European Regional Development Fund A way  
565 of making Europe, ACTRIS-España (RED2022-134824-E); and by the University of Granada Plan Propio through Excellence Research  
Unit Earth Science and Singular Laboratory AGORA (LS2022-1). EB is funded by MICIU/AEI/10.13039/501100011033 and the ESF and  
through FPI fellowship PRE2022-101272.

## References

- Adebiyi, A. A. and Kok, J. F.: Climate models miss most of the coarse dust in the atmosphere, *Science Advances*, 6, 1–10, <https://doi.org/10.1126/sciadv.aaz9507>, 2020.
- Anderson, T. L. and Ogren, J. A.: Determining Aerosol Radiative Properties Using the TSI 3563 Integrating Nephelometer, *Aerosol Science and Technology*, 29, 57–69, <https://doi.org/10.1080/02786829808965551>, 1998.
- Arnott, W. P., Moosmüller, H., Sheridan, P. J., Ogren, J. A., Raspet, R., Slaton, W. V., Hand, J. L., Kreidenweis, S. M., and Collett Jr., J. L.: Photoacoustic and filter-based ambient aerosol light absorption measurements: Instrument comparisons and the role of relative humidity, *Journal of Geophysical Research: Atmospheres*, 108, AAC 15–1–AAC 15–11, <https://doi.org/https://doi.org/10.1029/2002JD002165>, 2003.
- Arnott, W. P., Hamasha, K., Moosmüller, H., Sheridan, P. J., and Ogren, J. A.: Towards aerosol light-absorption measurements with a 7-wavelength aethalometer: Evaluation with a photoacoustic instrument and 3-wavelength nephelometer, *Aerosol Science and Technology*, 39, 17–29, <https://doi.org/10.1080/027868290901972>, 2005.
- Baldo, C., Formenti, P., Di Biagio, C., Lu, G., Song, C., Cazaunau, M., Pangui, E., Doussin, J.-F., Dagsson-Waldhauserova, P., Arnalds, O., Beddows, D., MacKenzie, A. R., and Shi, Z.: Complex refractive index and single scattering albedo of Icelandic dust in the shortwave part of the spectrum, *Atmospheric Chemistry and Physics*, 23, 7975–8000, <https://doi.org/10.5194/acp-23-7975-2023>, 2023.
- Balkanski, Y., Schulz, M., Claquin, T., and Guibert, S.: Reevaluation of Mineral aerosol radiative forcings suggests a better agreement with satellite and AERONET data, *Atmospheric Chemistry and Physics*, 7, 81–95, <https://doi.org/10.5194/acp-7-81-2007>, 2007.
- Bernardoni, V., Ferrero, L., Bolzacchini, E., Corina Forello, A., Gregorič, A., Massabò, D., Mocnik, G., Prati, P., Rigler, M., Santagostini, L., Soldan, F., Valentini, S., Valli, G., and Vecchi, R.: Determination of Aethalometer multiple-scattering enhancement parameters and impact on source apportionment during the winter 2017/18 EMEP / ACTRIS / COLOSSAL campaign in Milan, *Atmospheric Measurement Techniques*, 14, 2919–2940, <https://doi.org/10.5194/amt-14-2919-2021>, 2021.
- Bond, T., Doherty, S., Fahey, D., Forster, P., Berntsen, T., DeAngelo, B., Flanner, M., Ghan, S., Kärcher, B., Koch, D., Kinne, S., Kondo, Y., Quinn, P., Sarofi, M., Schultz, M., Venkataraman, C., Zhang, H., Zhang, S., Bellouin, N., Guittikunda, S., Hopke, P., Jacobson, M., Kaiser, J., Klimont, Z., Lohmann, U., Schwarz, J., Shindell, D., Storelvmo, T., Warren, S., and C.S., Z.: Bounding the role of black carbon in the climate system: A scientific assessment, *Journal of Geophysical Research: Atmospheres*, 118, 5380–5552, 2013.
- Bond, T. C. and Bergstrom, R. W.: Light absorption by carbonaceous particles: An investigative review, *Aerosol Science and Technology*, 40, 27–67, <https://doi.org/10.1080/02786820500421521>, 2006.
- Bond, T. C., Anderson, T. L., and Campbell, D.: Calibration and Intercomparison of Filter-Based Measurements of Visible Light Absorption by Aerosols, *Aerosol Science and Technology*, 30, 582–600, <https://doi.org/10.1080/027868299304435>, 1999.
- Caponi, L., Formenti, P., Massabò, D., Di Biagio, C., Cazaunau, M., Pangui, E., Chevaillier, S., Landrot, G., Andreae, M. O., Kandler, K., Piketh, S., Saeed, T., Seibert, D., Williams, E., Balkanski, Y., Prati, P., and Doussin, J.-F.: Spectral- and size-resolved mass absorption efficiency of mineral dust aerosols in the shortwave spectrum: a simulation chamber study, *Atmospheric Chemistry and Physics*, 17, 7175–7191, <https://doi.org/10.5194/acp-17-7175-2017>, 2017.
- Casquero-Vera, J., Lyamani, H., Titos, G., Minguillón, M., Dada, L., Alastuey, A., Querol, X., Petäjä, T., Olmo, F., and Alados-Arboledas, L.: Quantifying traffic, biomass burning and secondary source contributions to atmospheric particle number concentrations at urban and suburban sites, *Science of The Total Environment*, 768, 145 282, <https://doi.org/https://doi.org/10.1016/j.scitotenv.2021.145282>, 2021.

- Casquero-Vera, J. A., Lyamani, H., Dada, L., Hakala, S., Paasonen, P., Román, R., Fraile, R., Petäjä, T., Olmo-Reyes, F. J., and Alados-  
605 Arboledas, L.: New particle formation at urban and high-altitude remote sites in the south-eastern Iberian Peninsula, *Atmospheric Chemistry and Physics*, 20, 14 253–14 271, 2020.
- Collaud Coen, M., Weingartner, E., Apituley, A., Ceburnis, D., Fierz-Schmidhauser, R., Flentje, H., Henzing, J. S., Jennings, S. G., Moerman, M., Petzold, A., Schmid, O., and Baltensperger, U.: Minimizing light absorption measurement artifacts of the Aethalometer: Evaluation of five correction algorithms, *Atmospheric Measurement Techniques*, 3, 457–474, <https://doi.org/10.5194/amt-3-457-2010>, 2010.
- 610 Di Biagio, C., Formenti, P., Cazaunau, M., Pangui, E., Marchand, N., and Doussin, J.: Corrigendum to “ Aethalometer multiple scattering correction C ref for mineral dust aerosols ” published in *Atmos . Meas . Tech .*, 10 , 2923 – 2939 , 2017, *Atmospheric Measurement Techniques*, 10, 2923–2939, 2017.
- Di Biagio, C., Formenti, P., Balkanski, Y., Caponi, L., Cazaunau, M., Pangui, E., Journet, E., Nowak, S., Andreae, M. O., Kandler, K., Saeed, T., Piketh, S., Seibert, D., Williams, E., and Doussin, J.-F.: Complex refractive indices and single-scattering albedo of global dust  
615 aerosols in the shortwave spectrum and relationship to size and iron content, *Atmospheric Chemistry and Physics*, 19, 15 503–15 531, <https://doi.org/10.5194/acp-19-15503-2019>, 2019.
- Di Biagio, C., Balkanski, Y., Albani, S., Boucher, O., and Formenti, P.: Direct Radiative Effect by Mineral Dust Aerosols Constrained by New Microphysical and Spectral Optical Data, *Geophysical Research Letters*, 47, 1–12, <https://doi.org/10.1029/2019GL086186>, 2020.
- Drinovec, L., Močnik, G., Zotter, P., Prévôt, A., Ruckstuhl, C., Coz, E., Rupakheti, M., Sciare, J., Müller, T., Wiedensohler, A., and Hansen,  
620 A. D. A.: The "dual-spot" Aethalometer: an improved measurement of aerosol black carbon with real-time loading compensation, *Atmospheric Measurement Techniques*, 8, 1965–1979, 2015.
- Drinovec, L., Gregoric, A., Zotter, P., Wolf, R., Anne Bruns, E., Bruns, E. A., Prevot, A. S., Favez, O., Sciare, J., Arnold, I. J., Chakrabarty, R. K., Moosmüller, H., Filep, A., and Mocnik, G.: The filter-loading effect by ambient aerosols in filter absorption photometers depends on the coating of the sampled particles, *Atmospheric Measurement Techniques*, 10, 1043–1059, <https://doi.org/10.5194/amt-10-1043-2017>,  
625 2017.
- Drinovec, L., Jagodič, U., Pirker, L., Škarabot, M., Kurtjak, M., Vidović, K., Ferrero, L., Visser, B., Röhrbein, J., Weingartner, E., Kalbermatter, D. M., Vasilatou, K., Bühlmann, T., Pascale, C., Müller, T., Wiedensohler, A., and Močnik, G.: A dual-wavelength photothermal aerosol absorption monitor: design, calibration and performance, *Atmospheric Measurement Techniques*, 15, 3805–3825, <https://doi.org/10.5194/amt-15-3805-2022>, 2022.
- 630 ECAC-CAIS: Preliminary ACTRIS recommendations for aerosol in-situ sampling , measurements , and analyses, pp. 1–13, <https://www.actris-ecac.eu/measurement-guidelines.html>, 2022.
- European Commission, S.: DIRECTIVE OF THE EUROPEAN PARLIAMENT AND OF THE COUNCIL on ambient air quality and cleaner air for Europe., <https://data.consilium.europa.eu/doc/document/PE-88-2024-INIT/en/pdf>, 2024.
- Ferrero, L., Bernardoni, V., Santagostini, L., Cogliati, S., Soldan, F., Valentini, S., Massabò, D., Močnik, G., Gregorič, A., Rigler, M., Prati,  
635 P., Bigogno, A., Losi, N., Valli, G., Vecchi, R., and Bolzacchini, E.: Consistent determination of the heating rate of light-absorbing aerosol using wavelength- and time-dependent Aethalometer multiple-scattering correction, *Science of the Total Environment*, 791, <https://doi.org/10.1016/j.scitotenv.2021.148277>, 2021.
- Fialho, P., Hansen, A., and Honrath, R.: Absorption coefficients by aerosols in remote areas: a new approach to decouple dust and black carbon absorption coefficients using seven-wavelength Aethalometer data, *Journal of Aerosol Science*, 36, 267–282, 2005.
- 640 Fialho, P., Freitas, M. d. C., Barata, F., Vieira, B., Hansen, A., and Honrath, R.: The Aethalometer calibration and determination of iron concentration in dust aerosols, *Journal of Aerosol Science*, 37, 1497–1506, 2006.

- Frank Wagner, Daniele Bortoli, S. P. M. J. C. A. M. S. B. W. M. E. A. P. K. R. B. H. and Tegen, I.: Properties of dust aerosol particles transported to Portugal from the Sahara desert, *Tellus B: Chemical and Physical Meteorology*, 61, 297–306, <https://doi.org/10.1111/j.1600-0889.2008.00393.x>, 2009.
- 645 GAW-WMO: WMO/GAW Aerosol Measurement Procedures, Guidelines and Recommendations, WMO- No. 1177; GAW Report- No. 227, [https://library.wmo.int/doc/\\_num.php?explnum{id}=3073](https://library.wmo.int/doc/_num.php?explnum{id}=3073), 2016.
- González-Flórez, C., Klose, M., Alastuey, A., Dupont, S., Escribano, J., Etyemezian, V., Gonzalez-Romero, A., Huang, Y., Kandler, K., Nikolich, G., Panta, A., Querol, X., Reche, C., Yus-Díez, J., and Pérez García-Pando, C.: Insights into the size-resolved dust emission from field measurements in the Moroccan Sahara, *Atmospheric Chemistry and Physics*, 23, 7177–7212, [https://doi.org/10.5194/acp-23-](https://doi.org/10.5194/acp-23-7177-2023)
- 650 7177-2023, 2023.
- González-Romero, A., González-Flórez, C., Panta, A., Yus-Díez, J., Reche, C., Córdoba, P., Moreno, N., Alastuey, A., Kandler, K., Klose, M., Baldo, C., Clark, R. N., Shi, Z., Querol, X., and Pérez García-Pando, C.: Variability in sediment particle size, mineralogy, and Fe mode of occurrence across dust-source inland drainage basins: the case of the lower Drâa Valley, Morocco, *Atmospheric Chemistry and Physics*, 23, 15 815–15 834, <https://doi.org/10.5194/acp-23-15815-2023>, 2023.
- 655 González-Romero, A., González-Flórez, C., Panta, A., Yus-Díez, J., Córdoba, P., Alastuey, A., Moreno, N., Hernández-Chiriboga, M., Kandler, K., Klose, M., Clark, R. N., Ehlmann, B. L., Greenberger, R. N., Keebler, A. M., Brodrick, P., Green, R., Ginoux, P., Querol, X., and Pérez García-Pando, C.: Characterization of the particle size distribution, mineralogy, and Fe mode of occurrence of dust-emitting sediments from the Mojave Desert, California, USA, *Atmospheric Chemistry and Physics*, 24, 9155–9176, [https://doi.org/10.5194/acp-](https://doi.org/10.5194/acp-24-9155-2024)
- 660 24-9155-2024, 2024a.
- González-Romero, A., González-Flórez, C., Panta, A., Yus-Díez, J., Córdoba, P., Alastuey, A., Moreno, N., Kandler, K., Klose, M., Clark, R. N., Ehlmann, B. L., Greenberger, R. N., Keebler, A. M., Brodrick, P., Green, R. O., Querol, X., and Pérez García-Pando, C.: Probing Iceland’s dust-emitting sediments: particle size distribution, mineralogy, cohesion, Fe mode of occurrence, and reflectance spectra signatures, *Atmospheric Chemistry and Physics*, 24, 6883–6910, <https://doi.org/10.5194/acp-24-6883-2024>, 2024b.
- González-Romero, A., González-Flórez, C., Panta, A., Yus-Díez, J., Córdoba, P., Alastuey, A., Moreno, N., Hernández-Chiriboga, M., Kandler, K., Klose, M., Clark, R., Ehlmann, B., Greenberger, R., Keebler, A., Brodrick, P., Green, R., Hussein, T., Querol, X., and Pérez
- 665 García-Pando, C.: Physicochemical variability of dust-emitting sediments: Insights from diverse arid landscapes in Jordan, In preparation, 2025.
- Gundel, L., Dod, R., Rosen, H., and Novakov, T.: The relationship between optical attenuation and black carbon concentration for ambient and source particles, *Science of the Total Environment*, 36, 197–202, 1984.
- 670 Hansen, A., Rosen, H., and Novakov, T.: Real-time measurement of the absorption coefficient of aerosol particles, *Applied Optics*, 21, 3060–3062, 1982.
- Hansen, A., Rosen, H., and Novakov, T.: The aethaloemter- An instrument for the real-time measurement of optical absorption by particles, *The Science of the Total Environment*, 36, 191–196, 1984.
- Hess, M., Koepke, P., and Schult, I.: Optical properties of aerosols and clouds: The software package OPAC, *Bulletin of the American meteorological society*, 79, 831–844, 1998.
- 675 Huang, Y., Kok, J. F., Kandler, K., Lindqvist, H., Nousiainen, T., Sakai, T., Adebisi, A., and Jokinen, O.: Climate Models and Remote Sensing Retrievals Neglect Substantial Desert Dust Asphericity, *Geophysical Research Letters*, 47, 1–11, <https://doi.org/10.1029/2019GL086592>, 2020.

- Kalbermatter, D. M., Močnik, G., Drinovec, L., Visser, B., Röhrbein, J., Oscity, M., Weingartner, E., Hyvärinen, A.-P., and Vasilatou, K.: Comparing black-carbon-and aerosol-absorption-measuring instruments—a new system using lab-generated soot coated with controlled amounts of secondary organic matter, *Atmospheric measurement techniques*, 15, 561–572, 2022.
- Khlystov, A., S. C. and Pandis, S. N.: An Algorithm for Combining Electrical Mobility and Aerodynamic Size Distributions Data when Measuring Ambient Aerosol Special Issue of Aerosol Science and Technology on Findings from the Fine Particulate Matter Supersites Program, *Aerosol Science and Technology*, 38, 229–238, <https://doi.org/10.1080/02786820390229543>, 2004.
- Kok, J. F., Ridley, D. A., Zhou, Q., Miller, R. L., Zhao, C., Heald, C. L., Ward, D. S., Albani, S., and Haustein, K.: Smaller desert dust cooling effect estimated from analysis of dust size and abundance, *Nature Geoscience*, 10, 274–278, <https://doi.org/10.1038/ngeo2912>, 2017.
- Kok, J. F., Adebisi, A., Albani, S., Balkanski, Y., Checa-Garcia, R., Chin, M., Colarco, P., Hamilton, D., Huang, Y., Ito, A., Klose, M., Leung, D., Li, L., Mahowald, N., Miller, R., Obiso, V., Pérez García-Pando, C., Rocha-Lima, A., Wan, J., and Whicker, C.: Improved representation of the global dust cycle using observational constraints on dust properties and abundance, *Atmospheric Chemistry and Physics*, 21, 8127–8167, <https://doi.org/10.5194/acp-21-8127-2021>, 2021a.
- Kok, J. F., Adebisi, A., Albani, S., Balkanski, Y., Checa-Garcia, R., Chin, M., Colarco, P., Hamilton, D., Huang, Y., Ito, A., Klose, M., Li, L., Mahowald, N., Miller, R., Obiso, V., Pérez García-Pando, C., Rocha-Lima, A., and Wan, J.: Contribution of the world’s main dust source regions to the global cycle of desert dust, *Atmospheric Chemistry and Physics*, 21, 8169–8193, <https://doi.org/10.5194/acp-21-8169-2021>, 2021b.
- Kok, J. F., Storelvmo, T., Karydis, V. A., Adebisi, A. A., Mahowald, N. M., Evan, A. T., He, C., and Leung, D. M.: Mineral dust aerosol impacts on global climate and climate change, *Nature Reviews Earth & Environment*, 4, 71–86, 2023.
- Lack, D. A., Cappa, C. D., Covert, D. S., Baynard, T., Massoli, P., Sierau, B., Bates, T. S., Quinn, P. K., Lovejoy, E. R., and Ravishankara, A. R.: Bias in filter-based aerosol light absorption measurements due to organic aerosol loading: Evidence from ambient measurements, *Aerosol Science and Technology*, 42, 1033–1041, <https://doi.org/10.1080/02786820802389277>, 2008.
- Lafon, S., Sokolik, I. N., Rajot, J. L., Caquinau, S., and Gaudichet, A.: Characterization of iron oxides in mineral dust aerosols: Implications for light absorption, *Journal of Geophysical Research Atmospheres*, 111, 1–19, <https://doi.org/10.1029/2005JD007016>, 2006.
- Laing, J. R., Jaffe, D. A., and Sedlacek, A. J.: Comparison of filter-based absorption measurements of biomass burning aerosol and background aerosol at the mt. Bachelor observatory, *Aerosol and Air Quality Research*, 20, 663–678, <https://doi.org/10.4209/aaqr.2019.06.0298>, 2020.
- Laj, P., Bigi, A., Rose, C., Andrews, E., Lund Myhre, C., Collaud Coen, M., Wiedensohler, A., Schultz, M., Ogren, J., Fiebig, M., Gliß, J., Mortier, A., Pandolfi, M., Petäjä, T., Kim, S.-W., Aas, W., Putaud, J.-P., Mayol-Bracero, O., Keywood, M., Labrador, L., Aalto, P., Ahlberg, E., Alados Arboledas, L., Alastuey, A., Andrade, M., Artíñano, B., Ausmeel, S., Arsov, T., Asmi, E., Backman, J., Baltensperger, U., Bastian, S., Bath, O., Beukes, J. P., Brem, B., Bukowiecki, N., Conil, S., Couret, C., Day, D., Dayantolis, W., Degorska, A., Dos Santos, S. M., Eleftheriadis, K., Fetfatzis, P., Favez, O., Flentje, H., Gini, M., Gregorič, A., Gysel-Beer, M., Hallar, G., Hand, J., Hoffer, A., Hueglin, C., Hooda, R., Hyvärinen, A., Kalapov, I., Kalivitis, N., Kasper-Giebl, A., Kim, J. E., Kouvarakis, G., Kranjc, I., Krejci, R., Kulmala, M., Labuschagne, C., Lee, H.-J., Lihavainen, H., Lin, N.-H., Löschau, G., Luoma, K., Marinoni, A., Meinhardt, F., Merkel, M., Metzger, J.-M., Mihalopoulos, N., Nguyen, N. A., Ondracek, J., Pérez, N., Perrone, M. R., Petit, J.-E., Picard, D., Pichon, J.-M., Pont, V., Prats, N., Prenni, A., Reisen, F., Romano, S., Sellegri, K., Sharma, S., Schauer, G., Sheridan, P., Sherman, J. P., Schütze, M., Schwerin, A., Sohmer, R., Sorribas, M., Steinbacher, M., Sun, J., Titos, G., Tokzko, B., Tuch, T., Tulet, P., Tunved, P., Vakkari, V., Velarde, F., Velasquez, P., Villani, P., Vratolis, S., Wang, S.-H., Weinhold, K., Weller, R., Yela, M., Yus-Diez, J., Zdimal, V., Zieger, P., and Zikova, N.: A global

- analysis of climate-relevant aerosol properties retrieved from the network of GAW near-surface observatories, *Atmospheric Measurement Techniques*, pp. 1–70, <https://doi.org/10.5194/amt-2019-499>, 2020.
- Laskin, A., Laskin, J., and Nizkorodov, S. A.: Chemistry of Atmospheric Brown Carbon, *Chemical Reviews*, 115, 4335–4382, <https://doi.org/10.1021/cr5006167>, 2015.
- 720 Li, L., Mahowald, N. M., Miller, R., Pérez García-pando, C., Klose, M., Hamilton, D., Gonçalves Ageitos, M., Ginoux, P., Balkanski, Y., Green, R. O., Kalashnikova, O., Kok, J. F., Obiso, V., Paynter, D., and Thompson, D.: Quantifying the range of the dust direct radiative effect due to source mineralogy uncertainty, pp. 3973–4005, 2021.
- Lyamani, H., Olmo, F. J., and Alados-Arboledas, L.: Physical and optical properties of aerosols over an urban location in Spain: seasonal and diurnal variability, *Atmospheric Chemistry and Physics*, 10, 239–254, <https://doi.org/10.5194/acp-10-239-2010>, 2010.
- 725 Lyamani, H., Fernández-Gálvez, J., Pérez-Ramírez, D., Valenzuela, A., Antón, M., Alados, I., Titos, G., Olmo, F., and Alados-Arboledas, L.: Aerosol properties over two urban sites in South Spain during an extended stagnation episode in winter season, *Atmospheric Environment*, 62, 424–432, <https://doi.org/https://doi.org/10.1016/j.atmosenv.2012.08.050>, 2012.
- Massoli, P., Kebabian, P. L., Onasch, T. B., Hills, F. B., and Freedman, A.: Aerosol light extinction measurements by cavity attenuated phase shift (CAPS) spectroscopy: Laboratory validation and field deployment of a compact aerosol particle extinction monitor, *Aerosol Science and Technology*, 44, 428–435, 2010.
- 730 Modini, R. L., Corbin, J. C., Brem, B. T., Irwin, M., Bertò, M., Pileci, R. E., Fetfatzis, P., Eleftheriadis, K., Henzing, B., Moerman, M. M., Liu, F., Müller, T., and Gysel-Beer, M.: Detailed characterization of the CAPS single-scattering albedo monitor (CAPS PMssa) as a field-deployable instrument for measuring aerosol light absorption with the extinction-minus-scattering method, *Atmospheric Measurement Techniques*, 14, 819–851, <https://doi.org/10.5194/amt-14-819-2021>, 2021.
- 735 Moosmüller, H. and Arnott, W. P.: Folded Jamin interferometer: a stable instrument for refractive-index measurements, *Opt. Lett.*, 21, 438–440, <https://doi.org/10.1364/OL.21.000438>, 1996.
- Moosmüller, H., Chakrabarty, R. K., and Arnott, W. P.: Aerosol light absorption and its measurement: A review, *Journal of Quantitative Spectroscopy and Radiative Transfer*, 110, 844–878, <https://doi.org/10.1016/j.jqsrt.2009.02.035>, 2009.
- Moosmüller, H., Engelbrecht, J. P., Skiba, M., Frey, G., Chakrabarty, R. K., and Arnott, W. P.: Single scattering albedo of fine mineral dust aerosols controlled by iron concentration, *Journal of Geophysical Research: Atmospheres*, 117, 2012.
- 740 Müller, T., Henzing, J., Leeuw, G. d., Wiedensohler, A., Alastuey, A., Angelov, H., Bizjak, M., Collaud Coen, M., Engström, J., Gruening, C., Hillamo, R., Hoffer, A., Imre, K., Ivanow, P., Jennings, G., Sun, J., Kalivitis, N., Komppula, M., Laj, P., Li, S.-M., Lunder, C., Marinoni, A., Martins dos Santos, S., Moerman, M., Nowak, A., Ogře, J., Petzold, A., Pichon, J., Rodriguez, S., Sharma, S., Sherida, P., Tenilä, K., Tuch, T., Viana, M., Virkkula, A., Weingartner, E., R., W., and Wang, Y.: Characterization and intercomparison of aerosol absorption photometers: result of two intercomparison workshops, 2011a.
- 745 Müller, T., Laborde, M., Kassell, G., and Wiedensohler, A.: Design and performance of a three-wavelength LED-based total scatter and backscatter integrating nephelometer, *Atmospheric Measurement Techniques*, 4, 1291–1303, 2011b.
- Müller, T., Virkkula, A., and Ogren, J.: Constrained two-stream algorithm for calculating aerosol light absorption coefficient from the Particle Soot Absorption Photometer, *Atmospheric Measurement Techniques*, 7, 4049–4070, 2014.
- 750 Myhre, G., Shindell, D., Breón, F.-M., Collins, W., Fuglestad, J., Huang, J., Koch, D., Lamarque, J.-F., Lee, D., Mendoza, B., Nakajima, T., Robock, A., Stephens, G., Takemura, T., and Zhang, H.: Anthropogenic and Natural Radiative Forcing, book section 8, p. 659–740, Cambridge University Press, Cambridge, United Kingdom and New York, NY, USA, <https://doi.org/10.1017/CBO9781107415324.018>, 2013.

- Müller, T. and Fiebig, M.: ACTRIS In Situ Aerosol: Guidelines for Manual QC of AE33 absorption photometer data, ACTRIS Measurement Guidelines, <https://www.actris-ecac.eu/particle-light-absorption.html>, 2021.
- Ogren, J. A., Wendell, J., Andrews, E., and Sheridan, P. J.: Continuous light absorption photometer for long-Term studies, *Atmospheric Measurement Techniques*, 10, 4805–4818, <https://doi.org/10.5194/amt-10-4805-2017>, 2017.
- Panta, A., Kandler, K., Alastuey, A., González-Flórez, C., González-Romero, A., Klose, M., Querol, X., Reche, C., Yus-Díez, J., and Pérez García-Pando, C.: Insights into the single-particle composition, size, mixing state, and aspect ratio of freshly emitted mineral dust from field measurements in the Moroccan Sahara using electron microscopy, *Atmospheric Chemistry and Physics*, 23, 3861–3885, <https://doi.org/10.5194/acp-23-3861-2023>, 2023.
- Patrón, D., Lyamani, H., Titos, G., Casquero-Vera, J., Cardell, C., Močnik, G., Alados-Arboledas, L., and Olmo, F.: Monumental heritage exposure to urban black carbon pollution, *Atmospheric Environment*, 170, 22–32, <https://doi.org/https://doi.org/10.1016/j.atmosenv.2017.09.030>, 2017.
- Petzold, A. and Schönlinner, M.: Multi-angle absorption photometry—a new method for the measurement of aerosol light absorption and atmospheric black carbon, *Journal of Aerosol Science*, 35, 421–441, 2004.
- Petzold, A., Ogren, J. A., Fiebig, M., Laj, P., Li, S. M., Baltensperger, U., Holzer-Popp, T., Kinne, S., Pappalardo, G., Sugimoto, N., Wehrli, C., Wiedensohler, A., and Zhang, X. Y.: Recommendations for reporting black carbon measurements, *Atmospheric Chemistry and Physics*, 13, 8365–8379, <https://doi.org/10.5194/acp-13-8365-2013>, 2013.
- Romshoo, B., Pöhlker, M., Wiedensohler, A., Pfeifer, S., Saturno, J., Nowak, A., Ciupek, K., Quincey, P., Vasilatou, K., Ess, M. N., Gini, M., Eleftheriadis, K., Robins, C., Gaie-Levrel, F., and Müller, T.: Importance of size representation and morphology in modelling optical properties of black carbon: comparison between laboratory measurements and model simulations, *Atmospheric Measurement Techniques*, 15, 6965–6989, <https://doi.org/10.5194/amt-15-6965-2022>, 2022.
- Rovira, J., Savadkoohi, M., Chen, G. I., Močnik, G., Aas, W., Alados-Arboledas, L., Artiñano, B., Aurela, M., Backman, J., Banerji, S., Beddow, D., Brem, B., Chazeau, B., Coen, M. C., Colombi, C., Conil, S., Costabile, F., Coz, E., de Brito, J. F., Eleftheriadis, K., Favez, O., Flentje, H., Freney, E., Gregorič, A., Gysel-Beer, M., Harrison, R., Hueglin, C., Hyvärinen, A., Ivančič, M., Kalogridis, A.-C., Keernik, H., Konstantinos, G., Laj, P., Liakakou, E., Lin, C., Listrani, S., Luoma, K., Maasikmets, M., Manninen, H. E., Marchand, N., dos Santos, S. M., Mbengue, S., Mihalopoulos, N., Nicolae, D., Niemi, J. V., Norman, M., Ovadnevaite, J., Petit, J.-E., Platt, S., Prévôt, A. S., Pujadas, M., Putaud, J.-P., Riffault, V., Rigler, M., Rinaldi, M., Schwarz, J., Silvergren, S., Teinmaa, E., Teinilä, K., Timonen, H., Titos, G., Tobler, A., Vasilescu, J., Vratolis, S., Yttri, K. E., Yubero, E., Zíková, N., Alastuey, A., Petäjä, T., Querol, X., Yus-Díez, J., and Pandolfi, M.: A European aerosol phenomenology – 9: Light absorption properties of carbonaceous aerosol particles across surface Europe, *Environment International*, 195, 109 185, <https://doi.org/https://doi.org/10.1016/j.envint.2024.109185>, 2025.
- Saleh, R., Cheng, Z., and Atwi, K.: The Brown-Black Continuum of Light-Absorbing Combustion Aerosols, *Environmental Science and Technology Letters*, 5, 508–513, <https://doi.org/10.1021/acs.estlett.8b00305>, 2018.
- Samset, B. H., Sand, M., Smith, C. J., Bauer, S. E., Forster, P. M., Fuglestad, J. S., Osprey, S., and Schleussner, C. F.: Climate Impacts From a Removal of Anthropogenic Aerosol Emissions, *Geophysical Research Letters*, 45, 1020–1029, <https://doi.org/10.1002/2017GL076079>, 2018.
- Savadkoohi, M., Pandolfi, M., Reche, C., Niemi, J. V., Mooibroek, D., Titos, G., Green, D. C., Tremper, A. H., Hueglin, C., Liakakou, E., Mihalopoulos, N., Stavroulas, I., Artiñano, B., Coz, E., Alados-Arboledas, L., Beddows, D., Riffault, V., De Brito, J. F., Bastian, S., Baudic, A., Colombi, C., Costabile, F., Chazeau, B., Marchand, N., Gómez-Amo, J. L., Estellés, V., Matos, V., van der Gaag, E., Gille, G., Luoma, K., Manninen, H. E., Norman, M., Silvergren, S., Petit, J.-E., Putaud, J.-P., Rattigan, O. V., Timonen, H., Tuch, T., Merkel, M.,

- Weinhold, K., Vratolis, S., Vasilescu, J., Favez, O., Harrison, R. M., Laj, P., Wiedensohler, A., Hopke, P. K., Petäjä, T., Alastuey, A., and Querol, X.: The variability of mass concentrations and source apportionment analysis of equivalent black carbon across urban Europe, *Environment International*, 178, 108 081, <https://doi.org/https://doi.org/10.1016/j.envint.2023.108081>, 2023.
- 795 Singh, S., Fiddler, M. N., Smith, D., and Bililign, S.: Error analysis and uncertainty in the determination of aerosol optical properties using cavity ring-down spectroscopy, integrating nephelometry, and the extinction-minus-scattering method, *Aerosol Science and Technology*, 48, 1345–1359, <https://doi.org/10.1080/02786826.2014.984062>, 2014.
- Sokolik, I. N. and Toon, O. B.: Incorporation of mineralogical composition into models of the radiative properties of mineral aerosol from UV to IR wavelengths, *Journal of Geophysical Research Atmospheres*, 104, 9423–9444, <https://doi.org/10.1029/1998JD200048>, 1999.
- 800 Sorribas, M., Olmo, F. J., Quirantes, A., Lyamani, H., Gil-Ojeda, M., Alados-Arboledas, L., and Horvath, H.: Role of spheroidal particles in closure studies for aerosol microphysical–optical properties, *Quarterly Journal of the Royal Meteorological Society*, 141, 2700–2707, <https://doi.org/https://doi.org/10.1002/qj.2557>, 2015.
- Szopa, S., Naik, V., Adhikary, B., Artaxoand, P., Berntsen, T., Collins, W., Fuzzi, S., Gallardo, L., Kiendler-Scharr, A., Klimont, Z., Liao, H., Unger, N., and Zanis, P.: Short-Lived Climate Forcers, book chapter 6, pp. 817–922, Cambridge University Press, Cambridge, United Kingdom and New York, NY, USA, <https://doi.org/10.1017/9781009157896.008>, 2021.
- 805 Teri, M., Müller, T., Gasteiger, J., Valentini, S., Horvath, H., Vecchi, R., Bauer, P., Walser, A., and Weinzierl, B.: Impact of particle size, refractive index, and shape on the determination of the particle scattering coefficient—an optical closure study evaluating different nephelometer angular truncation and illumination corrections, *Atmospheric Measurement Techniques*, 15, 3161–3187, 2022.
- Titos, G., Lyamani, H., Pandolfi, M., Alastuey, A., and Alados-Arboledas, L.: Identification of fine (PM<sub>1</sub>) and coarse (PM<sub>10-1</sub>) sources of particulate matter in an urban environment, *Atmospheric Environment*, 89, 593–602, <https://doi.org/https://doi.org/10.1016/j.atmosenv.2014.03.001>, 2014.
- 810 Titos, G., Del Águila, A., Cazorla, A., Lyamani, H., Casquero-Vera, J., Colombi, C., Cuccia, E., Gianelle, V., Močnik, G., Alastuey, A., Olmo, F., and Alados-Arboledas, L.: Spatial and temporal variability of carbonaceous aerosols: assessing the impact of biomass burning in the urban environment, *Science of the Total Environment*, 578, 613–625, 2017.
- 815 Valentini, S., Barnaba, F., Bernardoni, V., Calzolari, G., Costabile, F., Di Liberto, L., Forello, A. C., Gobbi, G. P., Gualtieri, M., Lucarelli, F., Nava, S., Petralia, E., Valli, G., Wiedensohler, A., and Vecchi, R.: Classifying aerosol particles through the combination of optical and physical-chemical properties: Results from a wintertime campaign in Rome (Italy), *Atmospheric Research*, 235, 104 799, <https://doi.org/10.1016/j.atmosres.2019.104799>, 2020.
- Valenzuela, A., Olmo, F. J., Lyamani, H., Antón, M., Quirantes, A., and Alados-Arboledas, L.: Aerosol radiative forcing during African desert dust events (2005–2010) over Southeastern Spain, *Atmospheric Chemistry and Physics*, 12, 10 331–10 351, <https://doi.org/10.5194/acp-12-10331-2012>, 2012a.
- 820 Valenzuela, A., Olmo, F. J., Lyamani, H., Antón, M., Quirantes, A., and Alados-Arboledas, L.: Classification of aerosol radiative properties during African desert dust intrusions over southeastern Spain by sector origins and cluster analysis, *Journal of Geophysical Research: Atmospheres*, 117, <https://doi.org/https://doi.org/10.1029/2011JD016885>, 2012b.
- 825 Vecchi, R., Bernardoni, V., Paganelli, C., and Valli, G.: A filter-based light-absorption measurement with polar photometer: Effects of sampling artefacts from organic carbon, *Journal of Aerosol Science*, 70, 15–25, 2014.
- Virkkula, A., Mäkelä, T., Hillamo, R., Yli-Tuomi, T., Hirsikko, A., Hämeri, K., and Koponen, I. K.: A simple procedure for correcting loading effects of aethalometer data, *Journal of the Air and Waste Management Association*, 57, 1214–1222, <https://doi.org/10.3155/1047-3289.57.10.1214>, 2007.

- 830 Virkkula, A., Chi, X., Ding, A., Shen, Y., Nie, W., Qi, X., Zheng, L., Huang, X., Xie, Y., Wang, J., Petäjä, T., and Kulmala, M.: On the interpretation of the loading correction of the aethalometer, *Atmospheric Measurement Techniques*, 8, 4415–4427, <https://doi.org/10.5194/amt-8-4415-2015>, 2015.
- Visser, B., Röhrbein, J., Steigmeier, P., Drinovec, L., Močnik, G., and Weingartner, E.: A single-beam photothermal interferometer for in situ measurements of aerosol light absorption, *Atmospheric Measurement Techniques*, 13, 7097–7111, [https://doi.org/10.5194/amt-13-7097-](https://doi.org/10.5194/amt-13-7097-2020)  
835 2020, 2020.
- Weingartner, E., Saathoff, H., Schnaiter, M., Streit, N., Bitnar, B., and Baltensperger, U.: Absorption of light by soot particles: Determination of the absorption coefficient by means of aethalometers, *Journal of Aerosol Science*, 34, 1445–1463, [https://doi.org/10.1016/S0021-8502\(03\)00359-8](https://doi.org/10.1016/S0021-8502(03)00359-8), 2003.
- Yus-Díez, J., Bernardoni, V., Močnik, G., Alastuey, A., Ciniglia, D., Ivančič, M., Querol, X., Perez, N., Reche, C., Rigler, M., Vecchi, R.,  
840 Valentini, S., and Pandolfi, M.: Determination of the multiple-scattering correction factor and its cross-sensitivity to scattering and wavelength dependence for different AE33 Aethalometer filter tapes: a multi-instrumental approach, *Atmospheric Measurement Techniques*, 14, 6335–6355, <https://doi.org/10.5194/amt-14-6335-2021>, 2021.
- Yus-Díez, J., Via, M., Alastuey, A., Karanasiou, A., Minguillón, M. C., Perez, N., Querol, X., Reche, C., Ivančič, M., Rigler, M., and Pandolfi, M.: Absorption enhancement of black carbon particles in a Mediterranean city and countryside: effect of particulate matter  
845 chemistry, ageing and trend analysis, *Atmospheric Chemistry and Physics*, 22, 8439–8456, <https://doi.org/10.5194/acp-22-8439-2022>, 2022.
- Zanatta, M., Gysel, M., Bukowiecki, N., Müller, T., Weingartner, E., Areskoug, H., Fiebig, M., Yttri, K. E., Mihalopoulos, N., Kouvarakis, G., Beddows, D., Harrison, R., Cavalli, F., Putaud, J., Spindler, G., Widensohler, A., Alastuey, A., Pandolfi, M., Sellegri, K., Swietlicki, E., Jaffrezo, J., Baltensperger, U., and Laj, P.: A European aerosol phenomenology-5: Climatology of black carbon optical properties at 9  
850 regional background sites across Europe, *Atmospheric environment*, 145, 346–364, 2016.
